# Supplementary material
Source: PubMed Central journal article supplement (PMC4067766)
Supplement: NIHMS586997-supplement-Supplementary_Data.pdf [file NIHMS586997-supplement-Supplementary_Data.pdf]

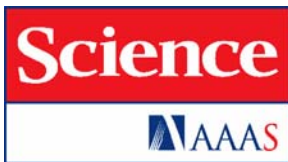

Supporting Online Material for  
**Genome-Wide RNAi Screen Identifies Letm1 as a Mitochondrial  
Ca<sup>2+</sup>/H<sup>+</sup> Antiporter**

Dawei Jiang, Linlin Zhao, David E. Clapham\*

\*To whom correspondence should be addressed. E-mail:  
dclapham@enders.tch.harvard.edu

Published 2 October 2009, *Science* **326**, 144 (2009)  
DOI: 10.1126/science.1175145

**This PDF file includes:**

SOM Text  
Materials and Methods  
Figs. S1 to S9  
Tables S1 to S3  
References

## Supporting Online Material (SOM)

### Supplementary Text and Discussion

The free energy of mitochondrial respiration drives ATP synthesis; this energy is stored as an  $H^+$  gradient across the inner mitochondrial membrane (IMM) created primarily by  $H^+$  extrusion via the electron transport chain (ETC). The  $H^+$  gradient that establishes the normally large negative membrane potential ( $\sim -180$  mV) across the IMM is a significant driving force for  $Ca^{2+}$  entry. Mitochondrial  $Ca^{2+}$  uptake occurs via tightly regulated channels and transporters. For example, the mitochondrial  $Ca^{2+}$  uniporter (MCU) is mediated at least in part by a highly  $Ca^{2+}$ -selective conductance (MiCa; (1, 2)). Increases in matrix  $[Ca^{2+}]$  enhance the activities of ATP synthase and enzymes in the tricarboxylic acid cycle, thus stimulating ATP production rates (3, 4). In turn, MCU/MiCa rapidly depolarizes the mitochondria and reduces  $Ca^{2+}$  entry, but may also abrogate the driving force for  $H^+$  entry and ATP synthase function. The evidence suggests that  $Na^+/Ca^{2+}$ ,  $Ca^{2+}/H^+$ , and other exchangers regulate mitochondrial  $Ca^{2+}$  homeostasis (5-8). If homeostatic mechanisms fail, high levels of matrix  $Ca^{2+}$  activate the mitochondrial permeability transition pore to induce necrotic or apoptotic cell death (9, 10). We set out to identify the genes that mediate  $Ca^{2+}$  flux across the mitochondrial inner membrane.

### Simultaneous measurement of $[Ca^{2+}]_{mito}$ and $[H^+]_{mito}$ using pericam

Mt-pericam, a mitochondrial matrix-targeted (fig. S1A), circularly-permuted green fluorescent protein fused to calmodulin and its target peptide M13 (11). Pericam emission due to excitation at 405 nm is sensitive to changes in  $[Ca^{2+}]$  while emission in response to excitation at 488 nm reports changes in pH. Pericam can be used for simultaneous  $Ca^{2+}$  and  $H^+$  detection (fig. S1B), its  $K_D$  and  $pK_a$  ideal for measuring mitochondrial  $Ca^{2+}$  and  $H^+$  concentrations ( $[Ca^{2+}]_{mito}$  and  $[H^+]_{mito}$ ; fig. S1C; (11)). In resting S2 cells stably expressing mitochondrial-targeted pericam, application of the  $H^+$  ionophore, FCCP (carbonyl cyanide p-trifluoromethoxyphenylhydrazone) dramatically increased  $[H^+]_{mito}$  with no immediate change in  $[Ca^{2+}]_{mito}$  (fig. S2A). To induce changes in  $[Ca^{2+}]_{cyto}$ , thapsigargin was employed. Thapsigargin blocks SERCA pumps to deplete ER  $Ca^{2+}$  stores and activate plasma membrane  $Ca^{2+}$ -selective CRAC channels (*Olf186-F* in *Drosophila*; *Orai* in mammalian cells; (12, 13)). A thapsigargin-induced, sustained cytoplasmic  $Ca^{2+}$  ( $[Ca^{2+}]_{cyto}$ ) elevation in S2 cells triggered not only mitochondrial  $Ca^{2+}$  uptake, but also mitochondrial  $H^+$  extrusion (fig. S2B). Following FCCP application,  $[H^+]_{mito}$  increased well above baseline without significantly affecting  $[Ca^{2+}]_{mito}$ .

Histamine receptor (phospholipase C-coupled H1) activation in HeLa cells transiently increased  $[Ca^{2+}]_{cyto}$ , which correlated with mitochondrial  $H^+$  efflux, and a delayed  $[Ca^{2+}]_{cyto}$  decline (at  $t > \sim 100$  s) coinciding with  $H^+$  entry (fig. S6). High  $[Ca^{2+}]_{mito}$  correlated with  $H^+$  influx into the mitochondria only at the lower  $[Ca^{2+}]_{cyto}$  (fig. S6B,C;  $t > 170$  s), arguing that  $H^+$  transport is not secondary to  $[Ca^{2+}]_{mito}$  alone, but rather the  $Ca^{2+}$  gradient across the IMM. Increasing bath  $[Ca^{2+}]$  from 2 mM to 10 mM prolonged the  $[Ca^{2+}]_{cyto}$  elevation phase and prevented the late  $H^+$  influx. The experiments confirmed mt-pericam's suitability for simultaneous  $Ca^{2+}$  and  $H^+$  measurements in intact mammalian cells and suggest mitochondrial  $H^+$  transport was not secondary to  $[Ca^{2+}]_{mito}$  alone, but rather the  $Ca^{2+}$  gradient across the IMM.

### **The identification of *Letm1* from a genome-wide RNAi screen**

Although mitochondrial respiration has been little studied in flies, RNA interference (RNAi) screens of *Drosophila* S2 cells have been an especially robust method for unbiased identification of genes when used with a reliable reporter. Reasoning that it was likely that mitochondrial mechanisms have been relatively well preserved in evolution, we conducted a *Drosophila* RNAi screen.

In order to cover genes encoding proteins of different turnover rates, 2 independent screens were performed. In each screen, 2 sets of sixty-two 384-well microplates containing the entire dsRNA collection were incubated with S2 cells for 3 or 5 days (fig. S2A, B; thus, the whole collection of the dsRNAs was screened 4 times). After dsRNA treatment,  $[Ca^{2+}]_{mito}$  and  $[H^+]_{mito}$  were measured in each well before and after addition of thapsigargin. Our screen achieved high signal-to-noise ratios and low well-to-well variation (fig. S3C). The scatter plot for values from duplicate wells demonstrates the reproducibility of the screen (fig. S3D).

From the primary screen, we identified a total of 776 hits according to the calculated Z-score (Table S1). Each hit was assigned a score according to their inhibition of  $[Ca^{2+}]_{mito}$  and/or  $[H^+]_{mito}$  changes relative to positive controls (*olf186-F* - CRAC channel, *Thread* - *Drosophila* inhibitor of apoptosis, and *Rho1* - Ras-like small GTPase). The majority of these genes were essential for cell viability (ribosomal proteins, mitotic proteins, transcription factors, etc; fig. S3E), and are commonly identified in other genome-wide screens. Reassuringly, all genes previously shown to regulate cytoplasmic  $Ca^{2+}$  (*SERCA*, *PMCA*s, *Stim1*, and the *CRAC/Orai* homolog, *olf186-F*) were among the most statistically significant hits. Of the genes encoding known mitochondrial proteins, many had well-defined functions (e.g., TOMM/TIMM complex proteins, respiratory chain subunits, metabolic enzymes). Genes encoding proteins of less well-characterized function, as well as some positive and negative controls, were tested in a secondary screen (Table S2). The influence of candidate genes on mitochondrial  $Ca^{2+}$  and  $H^+$  transport were then characterized in detail. dsRNAs against *Drosophila* UCP homologs did not affect  $[Ca^{2+}]_{mito}$  and  $[H^+]_{mito}$  changes induced by thapsigargin in intact cells or by  $Ca^{2+}$  applied to permeabilized S2 cells (fig. S4).

After the secondary screen, false-positive and relatively weak hits were eliminated from further consideration. A group of 10 genes were identified as potential candidates for mitochondrial  $Ca^{2+}$  transporters (Table S3). Comprehensive bioinformatic analyses eliminated genes containing no putative transmembrane spanning segments or lacking human orthologs. *CG4589*, the *Drosophila* homolog of a human gene named *Letm1* (*dLetm1*), was the sole hit satisfying all criteria and was the gene with the strongest impact on  $[Ca^{2+}]_{mito}$  and  $[H^+]_{mito}$  responses.

### **Discussion**

At high  $[Ca^{2+}]_{cyto}$ , MCU/MiCa is a rapid, high capacity  $Ca^{2+}$  influx mechanism. It rapidly depolarizes mitochondria, but it cannot restore  $Ca^{2+}_{mito}$  as MiCa's outward conductance is negligible under physiological conditions(2). We did not identify the gene encoding the

MCU/MiCa channel in our genome-wide screen, probably due to functional redundancy of multiple  $\text{Ca}^{2+}$  transporters, and future studies will be required to identify this gene.

Based on the result that the valinomycin dependent,  $\text{K}^+$  diffusion membrane potential accelerated the  $\text{Ca}^{2+}$  transport rate in liposomes, we hypothesize that the Letm1 activity depends on transmembrane voltage. Experiments under voltage control will be required to refine the estimated stoichiometry and to understand how this may affect the actions of Letm1 in cells.

The mitochondrial alkalization observed in some experiments may result, in part, from  $\text{Ca}^{2+}$  activation of mitochondrial metabolic enzymes.  $\text{Ca}^{2+}$  may, however, directly or indirectly stimulate  $\text{F}_0\text{F}_1\text{ATPase}$  activity, increasing the overall ATP production rate and resulting in more  $\text{H}^+$  influx.  $\text{Ca}^{2+}$  may also directly stimulate metabolite carriers, some of which also cause  $\text{H}^+$  influx. Thus, the net pH change caused by the effect of  $\text{Ca}^{2+}$  on oxidative phosphorylation requires a detailed comparison of all proton pathways.

In mitochondria,  $\text{Ca}^{2+}$  and  $\text{H}^+$  are critical regulators of mitochondria's primary function of oxidative phosphorylation. Mitochondria are well known to have significant  $\text{Ca}^{2+}$  buffering and storage capacity, but if  $\text{Ca}^{2+}$  influx is not compensated by efflux, apoptosis of the cell ensues. The Letm1  $\text{Ca}^{2+}/\text{H}^+$  exchanger mechanism is a critical component for mitochondrial  $[\text{Ca}^{2+}]$  and  $[\text{H}^+]$  homeostasis.

## Materials and Methods

### 1. Generation of pericam stable cell lines

*Drosophila* S2 cells were transfected with pericam sub cloned into the PMK33 vector (gene expression controlled by a *Drosophila* metallothionein promoter). Pericam expressing S2 cells were selected by applying 400  $\mu$ M hygromycin. A stable, tetracycline inducible Flp-In-293-pericam cell line was generated according to the manufacturer's instructions.

### 2. Genome-wide *Drosophila* RNAi screen

The high-throughput *Drosophila* RNAi screen was conducted according to protocols as previously described(14) with slight modifications. Briefly,  $2.5 \times 10^4$  S2-pericam cells were dispensed to each well of 384-well plates containing 0.25  $\mu$ g dsRNA in 10  $\mu$ l of Schneider's medium without serum (Invitrogen). After 60 min of incubation with dsRNAs, cells were supplemented with 30  $\mu$ l of *Drosophila* SFM (Invitrogen) with 0.75  $\mu$ M  $\text{CuSO}_4$  and incubated at 24°C for 3 or 5 days. Before fluorescence measurements, the cell media were changed to Krebs-Ringer-HEPES (KRH) buffer (125 mM NaCl, 5 mM KCl, 1.2 mM  $\text{KH}_2\text{PO}_4$ , 6 mM glucose, 1.2 mM  $\text{MgCl}_2$ , 2 mM  $\text{CaCl}_2$ , and 25 mM HEPES, pH 7.4). Fluorescence measurements were performed before and after the application of 1  $\mu$ M thapsigargin using an Analyst GT plate reader (Molecular Devices). Original fluorescence readings from 430 and 490 nm excitation were collected and converted to  $F_{490}/F_{430}$ ,  $-\Delta F_{430}/F_0$ , or  $-\Delta F_{490}/F_0$ . A Z-score was calculated for each well ( $(F_{\text{well}} - F_{\text{plate-mean}})/SD_{\text{plate}}$ ). Hits were selected using bar graph based analyses as well as the Heatmap tool from the *Drosophila* RNAi Screening Center ([http://flyrnai.org/cgi-bin/RNAi\\_heatmap\\_public.pl](http://flyrnai.org/cgi-bin/RNAi_heatmap_public.pl)). Commonly identified hits in other genome-wide screens can be searched from the database ([http://flyrnai.org/cgi-bin/RNAi\\_gene\\_lookup\\_public.pl](http://flyrnai.org/cgi-bin/RNAi_gene_lookup_public.pl)). Alternatively designed dsRNAs were tested for nearly half of the genes in the secondary screen.

### 3. Mammalian cell transfection

HeLa and Flp-In-293 cells were transfected with Effectene (Qiagen) according to the manufacturer's instructions. Full-length cDNA of human *Letm1* (BC021208) was obtained from Open Biosystems and subcloned in frame with a C-terminal sequence encoding the Cherry fluorescence protein.

### 4. RNAi in *Drosophila* and mammalian cells

dsRNAs against *Drosophila* were synthesized with the MEGAscript in vitro transcription kit (Ambion) using PCR fragments of the corresponding cDNAs as templates. siRNAs against human *Letm1* and standard scrambled control siRNAs were purchased from Ambion. HeLa cells were transfected with siRNAs using Lipofectamine RNAiMAX (Invitrogen) and incubated for 3 days before experiments. Concentrations of *olf186-F* dsRNAs were 10-100 times lower than the standard concentration used in the screen in order to optimize the experimental protocol for achieving efficient and consistent RNAi (data not shown). Sense sequence for *Letm1*-siRNA#1: UCCACAUUUGAGACUCAGUtt, *Letm1*-siRNA#2: AUGUCCAUUUGGCUGCUGtt.

## 5. $[Ca^{2+}]_{mito}$ , $[H^+]_{mito}$ , $[Ca^{2+}]_{cyto}$ , and $\Psi_{mito}$ measurements

Fluorescence measurements of cells expressing pericam were made using a FluoView 1000 confocal microscope (Olympus) in KRH buffer (intact cells). For experiments with permeabilized cells, 100  $\mu$ M digitonin was briefly applied followed by 10 min perfusion in intracellular solution (120 mM KCl, 0.5 mM  $KH_2PO_4$ , 10 mM succinate, 10 mM HEPES) with 1 mM EGTA. The cells were constantly perfused with intracellular medium with  $[Ca^{2+}]$  as indicated.  $[Ca^{2+}]_{mito}$  and  $[H^+]_{mito}$  were monitored at 405 nm and 488 nm excitation, respectively, and emission was collected at  $\sim$  530 nm. The pH dependent  $[Ca^{2+}]_{mito}$  and  $[H^+]_{mito}$  experiments were performed using solutions containing BAPTA at the concentrations indicated.  $[Ca^{2+}]_{cyto}$  was measured by loading the cells with 10  $\mu$ M Fluo-4 AM (Molecular Probes), measured at 488 nm excitation and 530 nm emission.  $\Psi_{mito}$  was measured using TMRM (Molecular Probes). Cells were loaded with 5 nM TMRM for 10 min, and the fluorescence levels (at 580 nm) measured from 543 nm excitation. Sharp cutoff dichroic emission filters enabled precise control of the excitation and emission wavelengths.

## 6. Isolation of Mitoplasts

Mitochondria were isolated by differential centrifugation as previously described(2). Isolated mitochondria were stored on ice in solution with 250 mM sucrose, 5 mM HEPES, and 1 mM EGTA (pH 7.2 with KOH). To remove the outer membrane, mitochondria were subjected to osmotic shock for 10 min in hypotonic solution containing 5 mM sucrose, 5 mM HEPES, and 1 mM EGTA (pH 7.2 with KOH) and resuspended in intracellular solution.

## 7. $Ca^{2+}_{mito}$ uptake into artificial liposomes by purified Letm1

Letm1-His bacterial expression and His-tag purification was conducted as previously described(15) with slight modifications. Isolated Letm1-His proteins (50  $\mu$ g/ml) were diluted to a final concentration of 2  $\mu$ g/ml for liposome reconstitution. 100 mg/ml asolectin and 10 mg/ml cardiolipin were sonicated until clear and mixed with 2  $\mu$ g/ml purified Letm1 protein, 1.4% TritonX-114. Detergent was removed by passing the mixture multiple times through Amberlite XAD-2 columns. Extraliposomal solutions were changed by passing through PD-10 desalting columns X2. Letm1 proteoliposome size was  $374 \pm 185$  nm (Zetasizer Nano ZS, Malvern Instruments).  $[Ca^{2+}]$  was measured by 10  $\mu$ M Fluo-4 salt, or Fluo-5N (Invitrogen), and pH measured by 10  $\mu$ M Snarf-5F (Invitrogen). Free  $[Ca^{2+}]$  or pH changes were calculated from initial dye calibration. Total  $[Ca^{2+}]$  was calculated using WEBMAXC (<http://www.stanford.edu/~cpatton/webmaxcS.htm>).

For experiments in Fig. 4B, liposome and external solution contained 200 mM HEPES, 100 mM TMA-OH, 1 mM BAPTA (free acid), pH 7.4;  $Ca^{2+}$  was added to create an initial free  $[Ca^{2+}] = 750$  nM. Changes in free  $[Ca^{2+}]$  were measured by the  $Ca^{2+}$ -sensitive fluorescent dye Fluo-4; total  $[Ca^{2+}]$  was calculated using WEBMAXC.

For Fig. 4C, liposomes were loaded with 240 mM HEPES, 60 mM TMA-OH, 1  $\mu$ M  $CaCl_2$  at pH 7.0. Solution contained 0.5 mM HEPES-TMA, 300 mM sucrose, 1  $\mu$ M

CaCl<sub>2</sub>, with initial pH = 7.0. Changes in pH were measured by the pH-sensitive fluorescent dye Snarf-5F.

For Fig. 4D,E, Liposomes were loaded with 230 mM HEPES, 70 mM TMA-OH, 1 μM CaCl<sub>2</sub> at pH 7.2. Solution contained 1 mM HEPES-TMA, 300 mM sucrose, 1 μM CaCl<sub>2</sub>, pH 7.2. HEPES-MES (50 mM, pH 6.5) or HEPES-Tris (50 mM, pH 8.0) was added as indicated. Changes in [Ca<sup>2+</sup>] were measured by Fluo-5N.

For Fig.4F, total Ca<sup>2+</sup> added was increased while free [Ca<sup>2+</sup>] remained < 1 μM by adjusting the concentration of Ca<sup>2+</sup> chelator. Calcium (μg protein; 70, 210, 700, 2100 nmol) was added in buffers containing BAPTA (0.1, 0.3, 1, 3 mM) to an initial free [Ca<sup>2+</sup>] = 750 nM.

## References

- S1. R. Rizzuto, P. Bernardi, T. Pozzan, *J Physiol* **529 Pt 1**, 37 (Nov 15, 2000).
- S2. Y. Kirichok, G. Krapivinsky, D. E. Clapham, *Nature* **427**, 360 (Jan 22, 2004).
- S3. G. Szabadkai, M. R. Duchen, *Physiology (Bethesda)* **23**, 84 (Apr, 2008).
- S4. G. Hajnoczky, L. D. Robb-Gaspers, M. B. Seitz, A. P. Thomas, *Cell* **82**, 415 (Aug 11, 1995).
- S5. K. K. Gunter, T. E. Gunter, *J Bioenerg Biomembr* **26**, 471 (Oct, 1994).
- S6. P. Bernardi, *Physiol Rev* **79**, 1127 (Oct, 1999).
- S7. N. Demaurex, D. Poburko, M. Frieden, *Biochim Biophys Acta* **6**, 6 (Jan 6, 2009).
- S8. D. G. Nicholls, *Biochim Biophys Acta* **1777**, 550 (Jul-Aug, 2008).
- S9. A. Rasola, P. Bernardi, *Apoptosis* **12**, 815 (May, 2007).
- S10. M. Giacomello, I. Drago, P. Pizzo, T. Pozzan, *Cell Death Differ* **14**, 1267 (Jul, 2007).
- S11. T. Nagai, A. Sawano, E. S. Park, A. Miyawaki, *Proc Natl Acad Sci U S A* **98**, 3197 (Mar 13, 2001).
- S12. S. Feske *et al.*, *Nature* **441**, 179 (May 11, 2006).
- S13. S. L. Zhang *et al.*, *Proc Natl Acad Sci U S A* **103**, 9357 (Jun 13, 2006).
- S14. N. Ramadan, I. Flockhart, M. Booker, N. Perrimon, B. Mathey-Prevot, *Nat Protoc* **2**, 2245 (2007).
- S15. J. A. Mayor *et al.*, *J Bioenerg Biomembr* **29**, 541 (Dec, 1997).

**Fig. S1. Pericam-based simultaneous measurement of  $[Ca^{2+}]_{mito}$  and  $[H^+]_{mito}$  in S2 cells.** (A) Representative images of an isolated mitochondrion from S2-pericam cells (left). Mitoplast after the outer membrane was disrupted by osmotic shock (right). Note that pericam is located in the mitochondrial matrix. Scale bar = 2  $\mu$ m. (B) Representative traces of  $[Ca^{2+}]_{mito}$  and  $[H^+]_{mito}$  measured from 405 nm and 488 nm excitation, respectively. Cells were permeabilized briefly with 100  $\mu$ M digitonin, washed with digitonin-free intracellular solution for 10-15 min, and placed in various  $[Ca^{2+}]$  (n=3, 104 cells) or pH (n=3, 123 cells) as indicated, in the presence of 10  $\mu$ M ionomycin (or 4-Bromo-A23187) and 20  $\mu$ M FCCP. Ionomycin (or 4-Bromo-A23187)  $Ca^{2+}$  ionophores, and FCCP protonophore, dissipate the mitochondrial membrane potential and allow  $Ca^{2+}$  and  $H^+$  to move along their respective concentration gradients. (C)  $[Ca^{2+}]_{mito}$  and  $[H^+]_{mito}$  measured as in B.  $F_0$  is the pericam fluorescence level in intact S2 cells in normal KRH buffer. Cells were then permeabilized briefly, washed, and placed in various  $[Ca^{2+}]$  (n=3, 86 cells) or pH (n=3, 102 cells) as indicated, in the presence of 10  $\mu$ M 4-Bromo-A23187 and 20  $\mu$ M FCCP. Data shown are mean  $\pm$  S.E.M.

**Fig. S2. Simultaneous measurement of  $[Ca^{2+}]_{mito}$  and  $[H^+]_{mito}$  in intact S2 cells.** (A) Representative traces of  $[Ca^{2+}]_{mito}$  and  $[H^+]_{mito}$  signals in response to FCCP in S2-pericam cells (n=3, 132 cells). (B) Representative traces of thapsigargin-induced changes in  $[Ca^{2+}]_{mito}$  and  $[H^+]_{mito}$  in S2-pericam cells (n=3, 117 cells).

**Fig. S3. Genome-wide *Drosophila* RNAi screen for mitochondrial  $Ca^{2+}$  transporters.** *Drosophila* S2 cells stably expressing mitochondrial-targeted ratiometric pericam were incubated with arrayed double-stranded (ds)RNAs against each of the ~22,000 *Drosophila* genes. Two independent screens were performed with RNAi incubation for either 3 or 5 days. The highly  $Ca^{2+}$ -selective *Drosophila* Orai/CRAC channel (*olf186-F*) served as a positive control. (A) Schematic diagram of the screening protocol. (B) Knockdown of CRAC (*olf186-F*) inhibited changes in mitochondrial  $[Ca^{2+}]$  and  $[H^+]$  upon 1  $\mu$ M thapsigargin stimulation. Mitochondrial  $Ca^{2+}$  and  $H^+$  levels in *Drosophila* S2 cells were measured at 405 nm and 488 nm excitation wavelengths of stably transfected pericam. Ionomycin (5  $\mu$ M) was applied to elicit maximum  $Ca^{2+}$  entry. Data shown are representative traces from cells treated with scrambled control (black line; n=3, 94 cells) or *olf186-F* dsRNAs (red or blue line; n=3, 87 cells). (C) Heatmap view of a representative 384-well screen plate with dsRNAs against *olf186-F* (CRAC channel; 13A and 14P), *Thread* (DIAP1; 13B, 13G, 14O and 14J) and *Rho1* (13D, 13E, 14N and 14K) as positive controls and dsRNAs against GFP (13C, 13F, 14M and 14L) as negative controls. Values are Z-scores ( $[F_{well} - F_{plate-mean}] / SD_{plate}$ ) derived from  $-\Delta F_{430} / F_0$  of each well. (D) Scatter plot for the Z-scores of thapsigargin-induced  $[Ca^{2+}]_{mito}$  changes from duplicate screen wells (from the 5-day RNAi screen, 3 min after thapsigargin application). (E) Functional classification of the hits from the primary screen. 'Housekeeping' genes encode ribosomal, proteasomal, cytoskeletal, chromosomal, Golgi, TOMM/TIMM complex, respiratory chain subunits, and metabolic enzyme proteins.

**Fig. S4. UCP2, 3 homolog knockdown does not affect changes in  $[Ca^{2+}]_{mito}$  and  $[H^+]_{mito}$ .** (A) Thapsigargin induced  $[Ca^{2+}]_{mito}$  and  $[H^+]_{mito}$  changes in S2-pericam cells treated with a mixture of dsRNAs against *UCP4* and 5 (labeled 'UCP'; squares; n=3, 97



cells), the *Drosophila* UCP homologues of *UCP2* and *UCP3*. **(B)**  $[Ca^{2+}]_{mito}$  and  $[H^+]_{mito}$  measurements in digitonin-permeabilized S2-pericam cells treated with dsRNAs against *UCP4* and *5* (squares; n=3, 72 cells).  $Ca^{2+}$  was applied as indicated. Short-dashed lines indicate control levels. Data shown are mean values  $\pm$  S.E.M.

**Fig. S5. Calibration of basal  $[Ca^{2+}]_{mito}$  and  $[H^+]_{mito}$  in control and *dLetm1* knockdown cells.** S2-pericam cells treated with scrambled control (n=3, 117 cells) or *dLetm1* dsRNA (n=3, 96 cells) were permeabilized briefly, washed, baseline fluorescence measured (at 405 nm and 488 nm excitation), and the cells placed in various  $[Ca^{2+}]$  or pH as indicated, in the presence of 10  $\mu$ M ionomycin and 20  $\mu$ M FCCP.  $F_0$  is the fluorescence level in 1mM EGTA solution (405 nm) and pH 7.0 (488 nm). Data shown are mean  $\pm$  S.E.M.

**Fig. S6. HeLa  $[Ca^{2+}]_{mito}$  and  $[H^+]_{mito}$  in 10 and 2 mM  $[Ca^{2+}]_o$ .** **(A)** mt-pericam is targeted to mitochondria in HeLa cells. **(B)** High external  $[Ca^{2+}]_o$  prolongs histamine-induced  $[Ca^{2+}]_{cyto}$  changes in HeLa cells (10 mM  $[Ca^{2+}]_o$ : red lines; n=3, 91 cells) compared to lower  $Ca^{2+}$  (2 mM  $[Ca^{2+}]_o$ : black lines; n=3, 87 cells). **(C)** Representative traces of histamine-induced changes in  $[Ca^{2+}]_{mito}$  and  $[H^+]_{mito}$  in 2 mM  $[Ca^{2+}]_o$  (black lines, n=5, 98 cells) or 10 mM  $[Ca^{2+}]_o$  (colored lines; n=3, 52 cells). High and low  $[Ca^{2+}]_o$  resulted in indistinguishable  $[Ca^{2+}]_{mito}$ . High  $[Ca^{2+}]_o$  was not correlated with the late  $H^+$  influx observed in lower  $[Ca^{2+}]_o$ .

**Fig. S7. *Letm1* knockdown increases basal  $\Psi_{mito}$  in HeLa cells.** **(A)** Representative images of HeLa cells treated with scrambled control (left) or *Letm1* siRNA (right) and loaded with 5 nM TMRM for 10 min. **(B)** TMRM fluorescence level in scrambled control (left; n = 3, 53 cells) or *Letm1* siRNA-treated (right; n=3, 67 cells) HeLa cells. Data shown are mean  $\pm$  S.E.M. The asterisks indicate  $P < 0.05$  in a two-tailed Student's *t* test.

**Fig. S8.  $Ca^{2+}$  uptake in *Letm1* proteoliposomes.** **(A)**  $Ca^{2+}$  addition initially increased external  $[Ca^{2+}]$  (measured with Fluo-4), followed by  $Ca^{2+}$  import as indicated by falling fluorescence (triangles; n=3).  $Ca^{2+}$  uptake was blocked by RuR (10 nmol/ $\mu$ g, circles; n=3), which was reversed by the  $Ca^{2+}$  ionophore, 4-Bromo-A23187 (5  $\mu$ M). Ruthenium 360 similarly inhibited  $Ca^{2+}$  uptake (not shown).  $Ca^{2+}$  uptake by *Letm1* proteoliposomes loaded with 200 mM HEPES, 3 mM BAPTA, 80 mM KCl, pH 7.4 (NaOH), without (triangles; n=3) and with (circles; n=3) 10 nmol/ $\mu$ g Ruthenium Red. Valinomycin (50 nM) was added at time 0 to generate a  $K^+$  diffusion membrane potential. **(B)** Calculated  $Ca^{2+}$  transport velocity (nmol/ $\mu$ g protein/s) was plotted against various transliposomal  $K^+$  gradients. Experiments were done as in **A** but with 0, 20, 50 mM KCl added to the external solution to obtain the different  $K^+$  gradients (n=3).  $Ca^{2+}$  transport velocity in 0  $K^+$  gradient was measured in liposomes loaded in  $K^+$ -free buffer. All data shown are mean  $\pm$  S.E.M. The asterisk indicates  $P < 0.05$  in a two-tailed Student's *t* test.

**Fig. S9. *Letm1* structural prediction.** Structural prediction of human full-length *Letm1* sequence by *Robetta* (<http://rosetta.bakerlab.org/>), displayed using PyMOL. The *Letm1*-like domain is evolutionarily conserved in *Letm1* isoforms and homologous genes. The long  $\alpha$ -helices domain shown below is assumed to extend into the mitochondrial matrix.

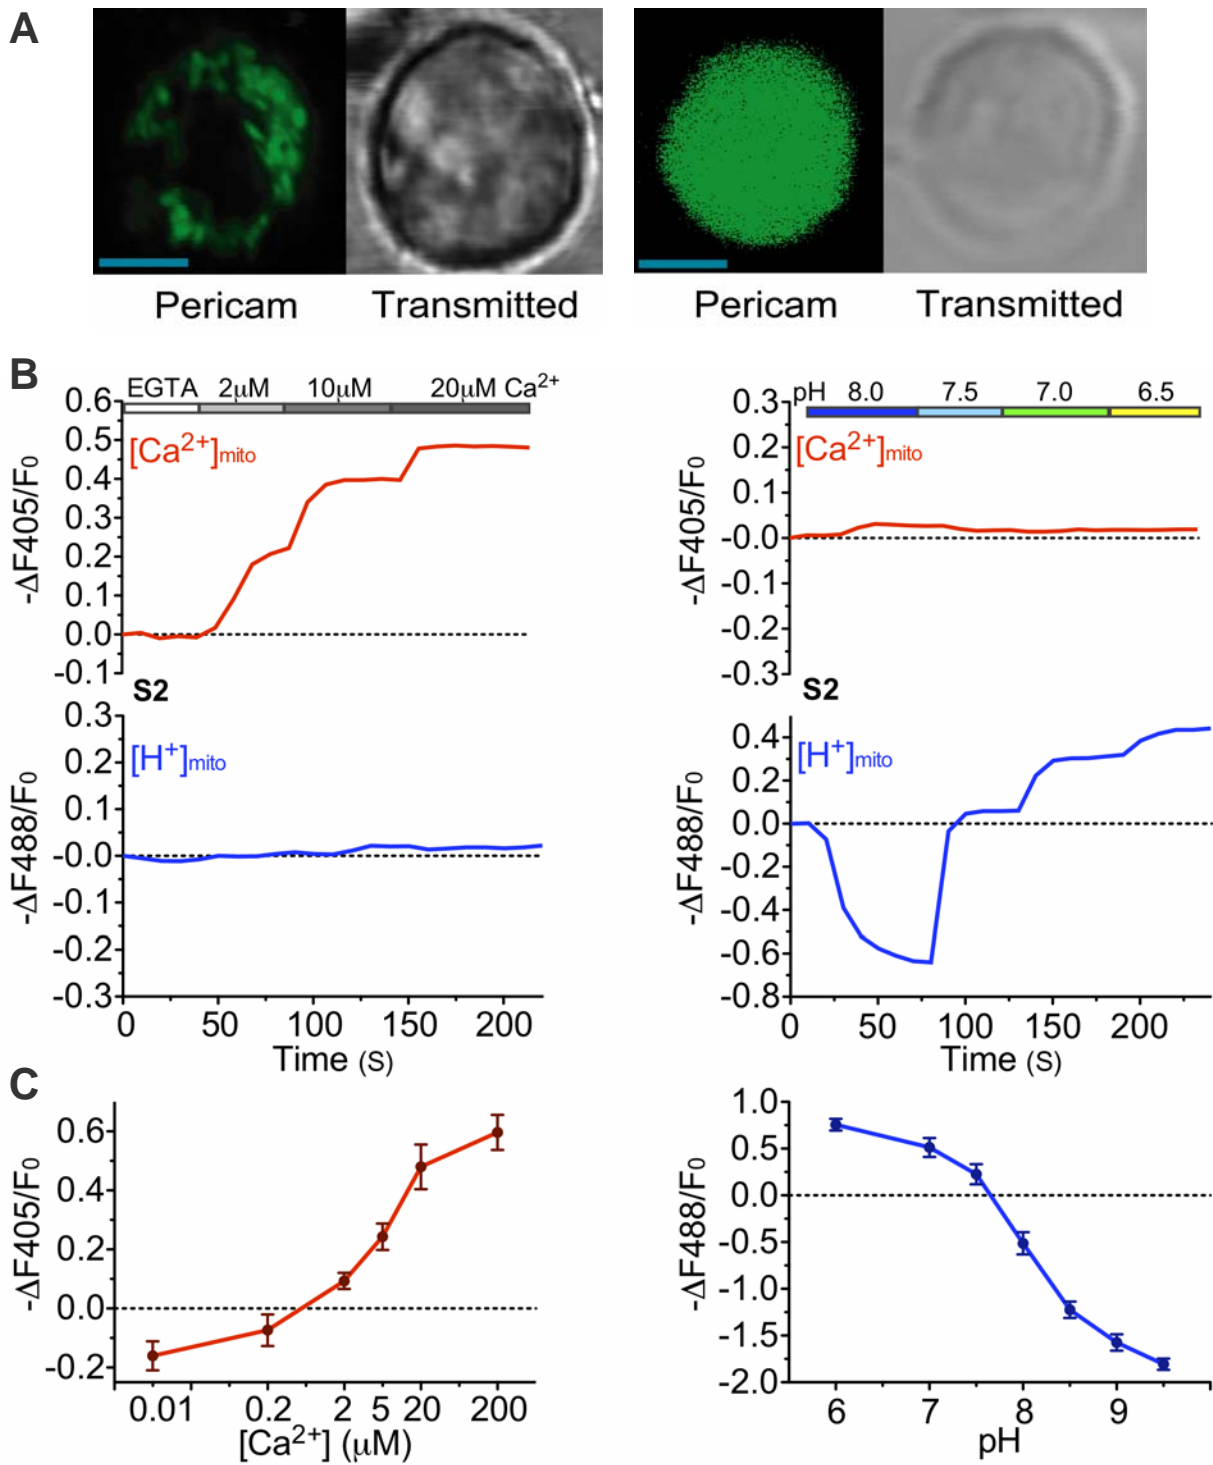

Figure S1

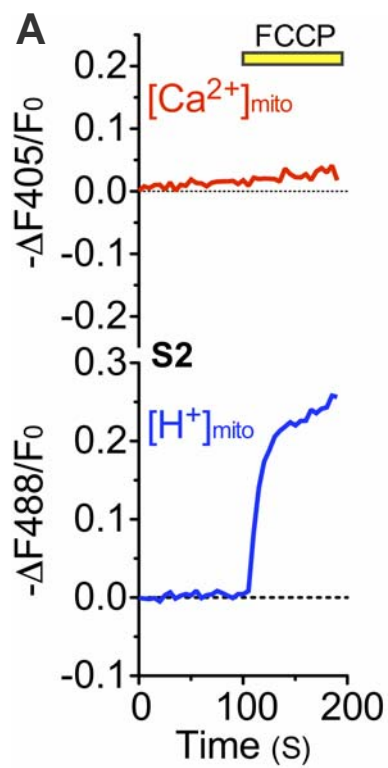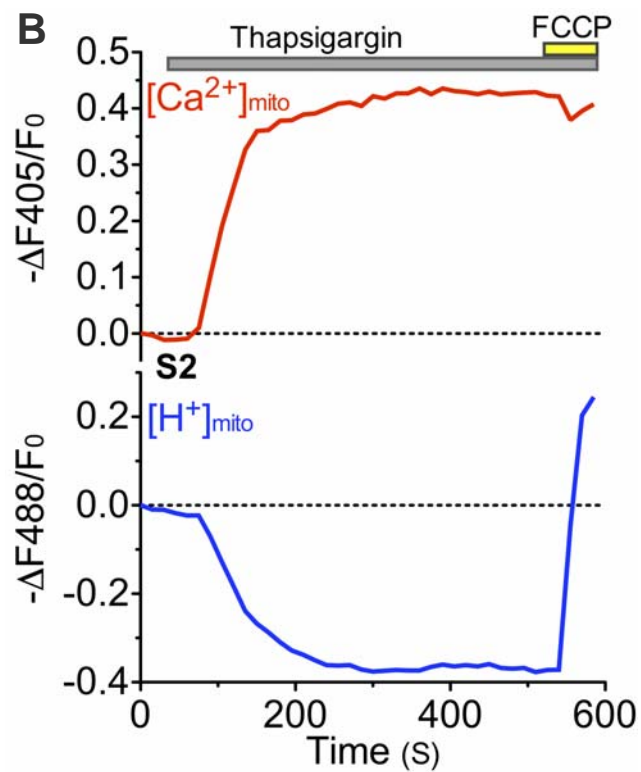

Figure S2

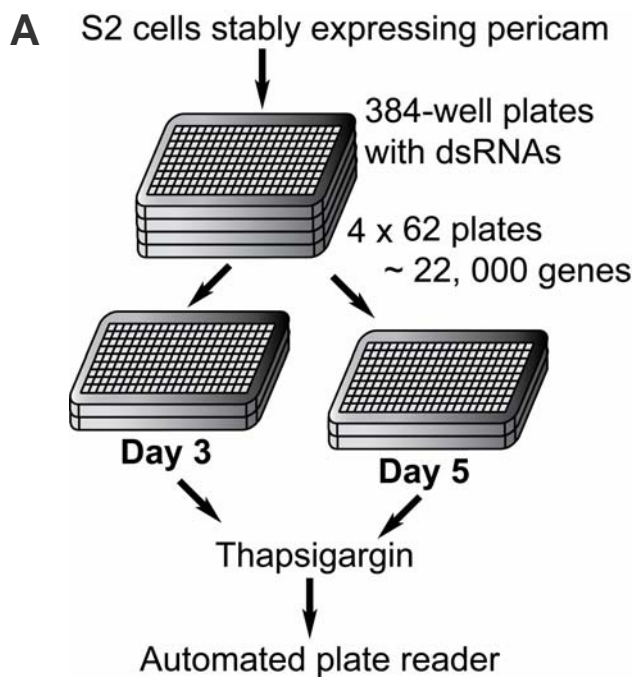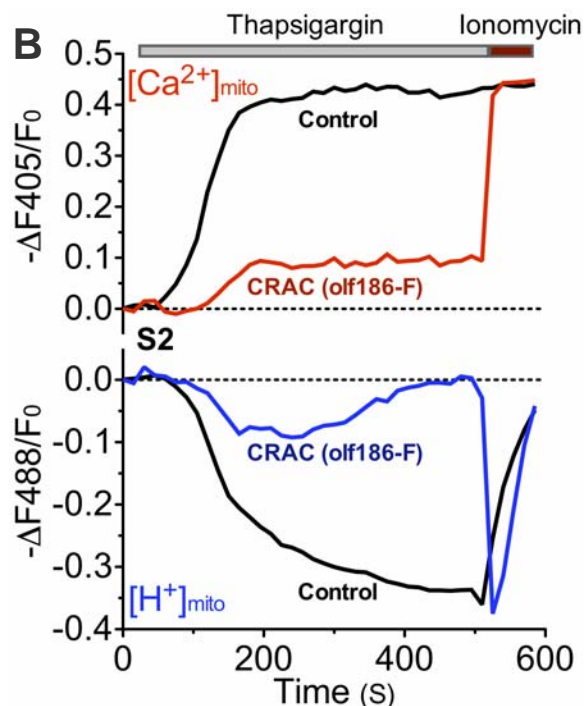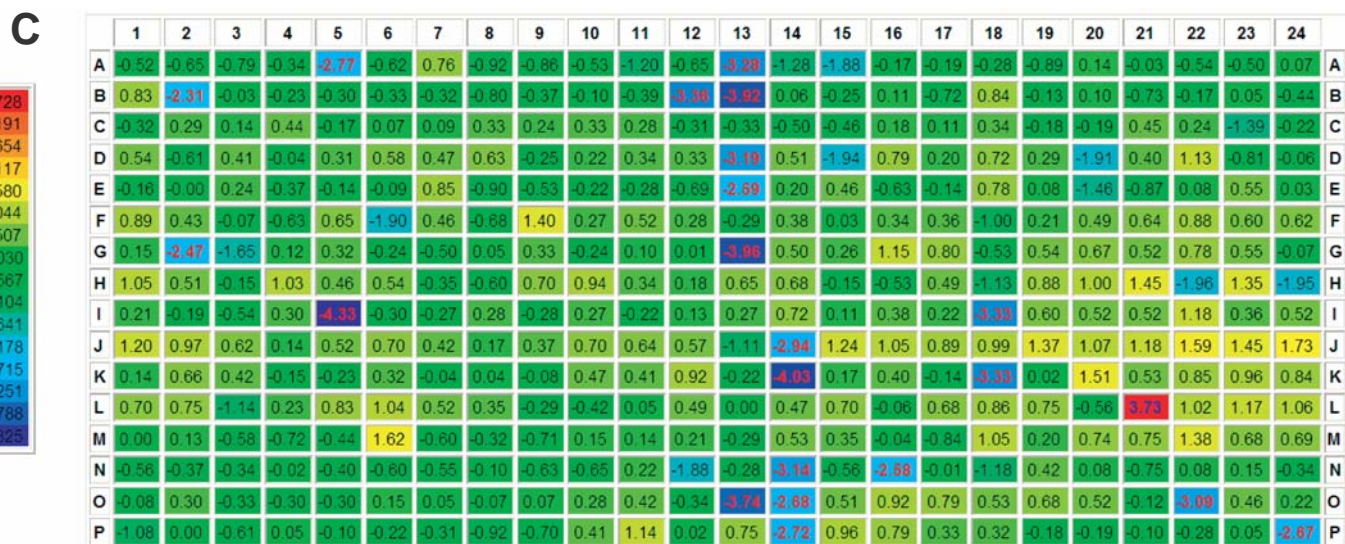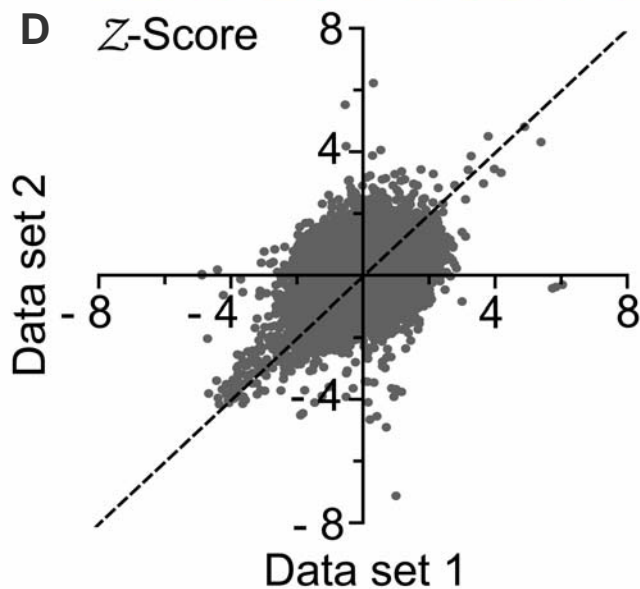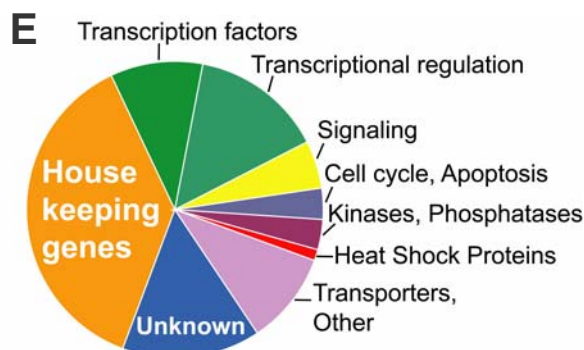

Figure S3



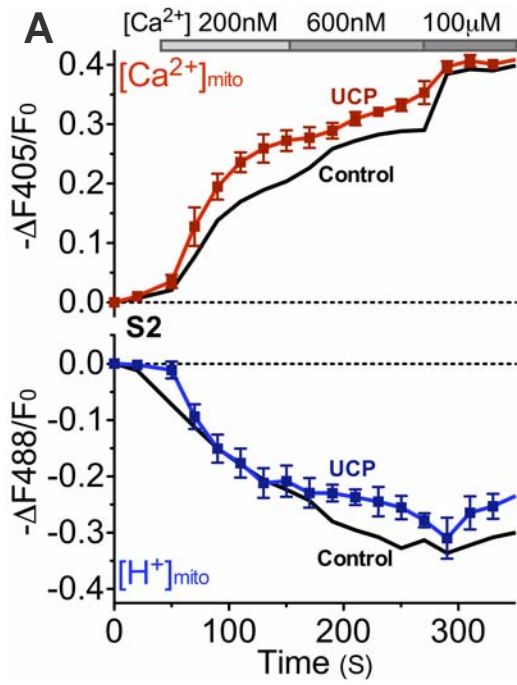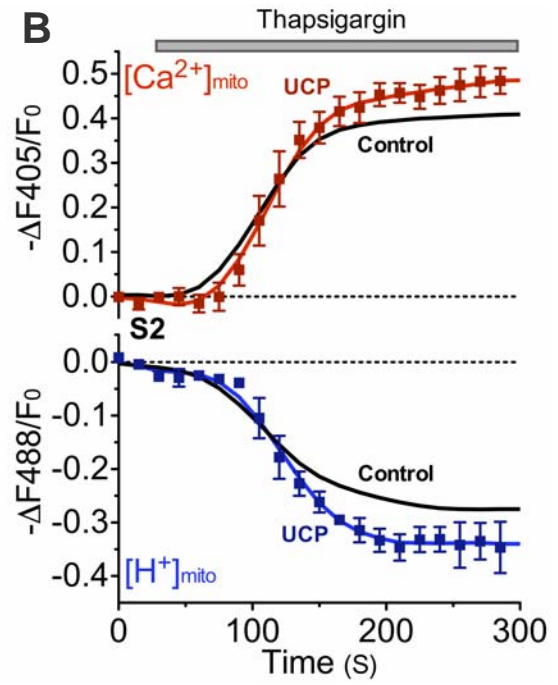

Figure S4

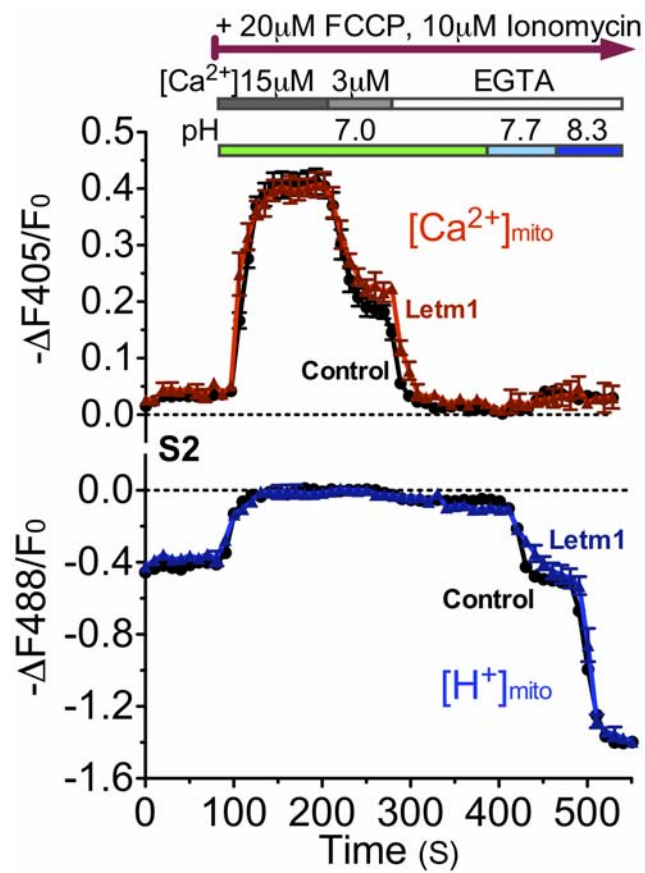

Figure S5

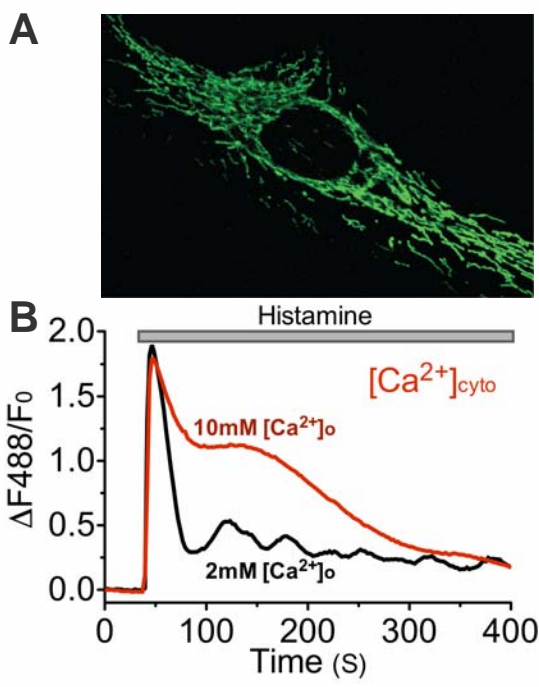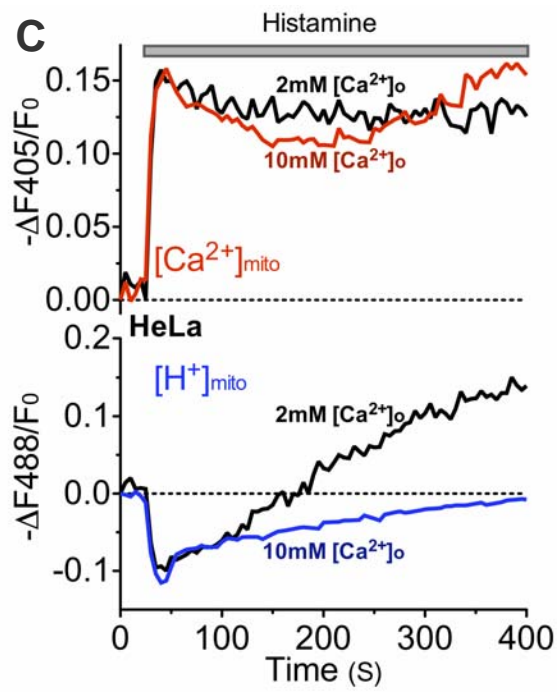

Figure S6

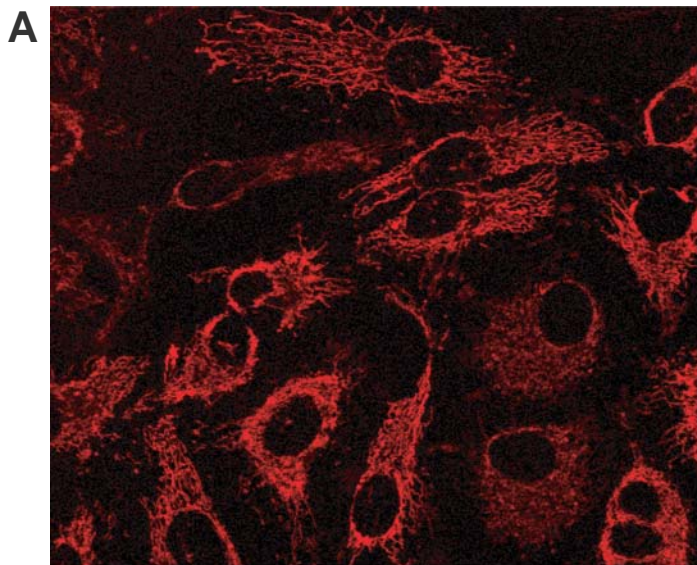

Control siRNA

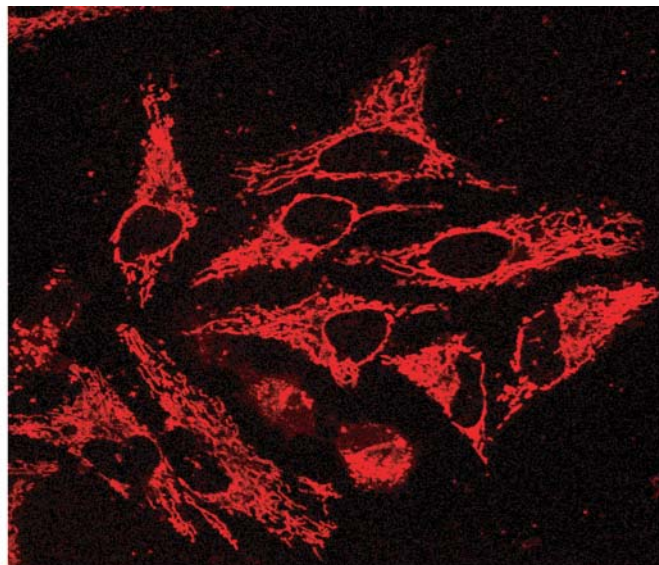

Letm1 siRNA

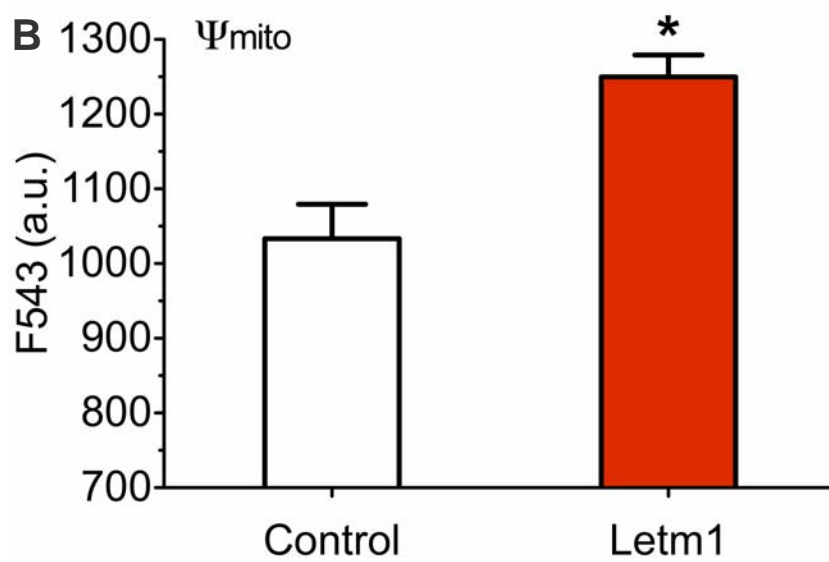

Figure S7



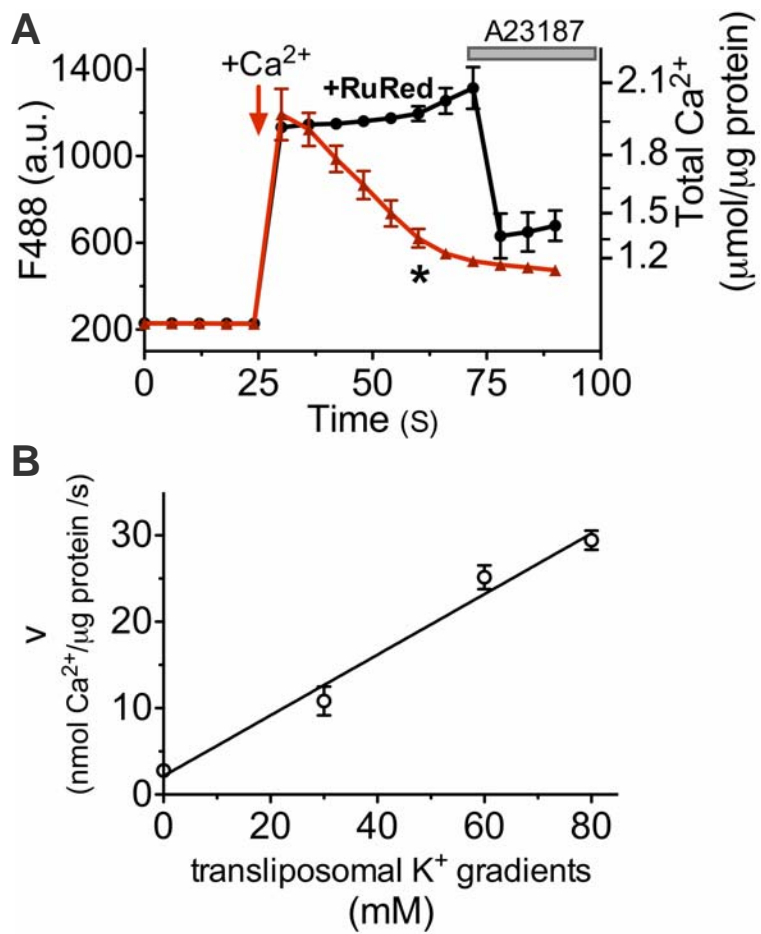

Figure S8

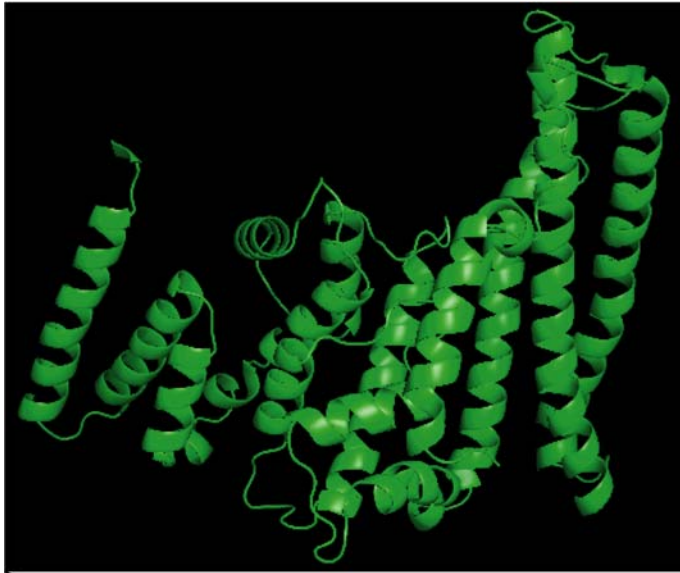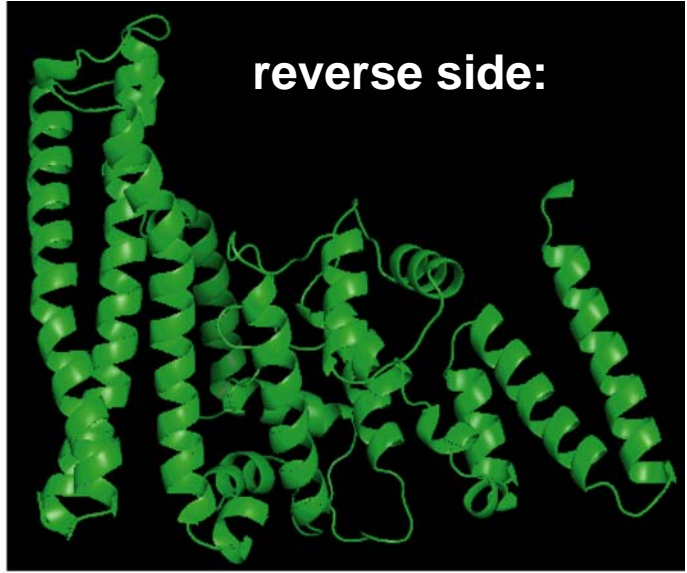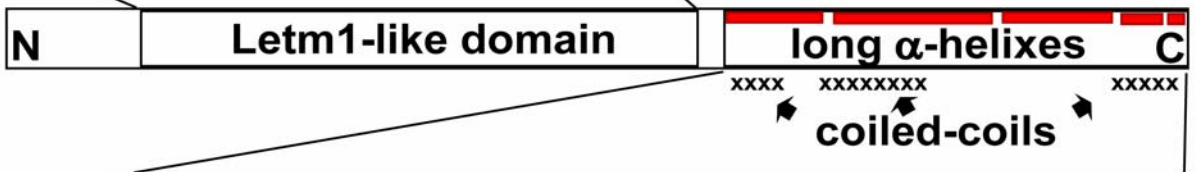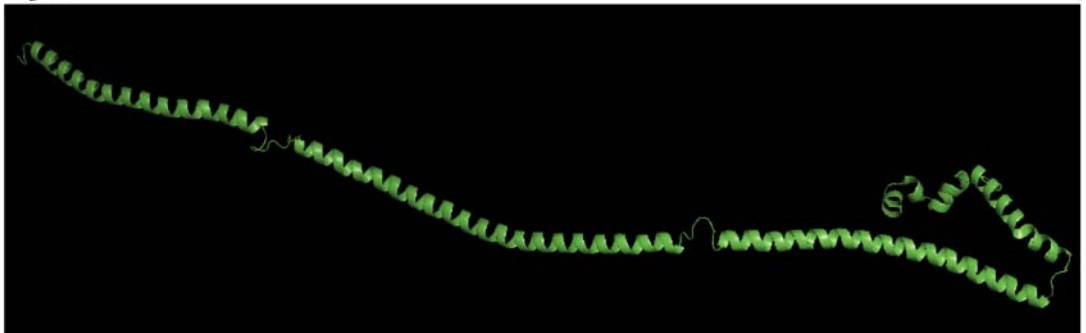

Figure S9

**Table S1. Hits from the primary screen.**

Each gene identified from the primary screen was assigned a score based on relative  $[Ca^{2+}]_{mito}$  and  $[H^+]_{mito}$  changes compared to positive controls (olf186-F, Thread and Rho1). Genes with similar inhibitory effects as the positive controls were assigned a score of 3; those showing 50-75% inhibition compared to control levels were scored as 2, and 25-50% of control levels as 1. Off-target effects of each amplicon were predicted by DRSC based on exact 21 nucleotide homology searches.

| <b>DRSC Amplicon</b> | <b>Of Interest</b> | <b>Gene</b> | <b>Human Homologene</b> | <b>19 bp Matches</b> |
|----------------------|--------------------|-------------|-------------------------|----------------------|
| DRSC23852            | 1                  | phol        |                         | 0                    |
| DRSC25951            | 1                  | Rpn7        | PSMD6                   | 0                    |
| DRSC25879            | 1                  | sta         | RPSA                    | 0                    |
| DRSC25776            | 3                  | MED25       |                         | 0                    |
| DRSC25781            | 1                  | Smr         |                         | 0                    |
| DRSC23542            | 2                  | Spx         | SF3B4                   | 0                    |
| DRSC23432            | 1                  | MED31       | MED31                   | 0                    |
| DRSC25109            | 1                  | Rm62        |                         | 0                    |
| DRSC25032            | 1                  | RpL4        | RPL4                    | 0                    |
| DRSC23411            | 1                  | RpLP1       | RPLP1                   | 0                    |
| DRSC25850            | 2                  | CG33859     | HIST2H2AB               | 24                   |
| DRSC23587            | 1                  | MED14       | CRSP2                   | 0                    |
| DRSC25135            | 1                  | MED4        | MED4                    | 0                    |
| DRSC26355            | 2                  | RpS30       | FAU                     | 0                    |
| DRSC26152            | 2                  | noi         | SF3A3                   | 0                    |
| DRSC26269            | 3                  | Tbp-1       | PSMC3                   | 0                    |
| DRSC26498            | 3                  | CG3523      | FASN                    | 0                    |
| DRSC26497            | 2                  | Su(Tpl)     | ELL2                    | 0                    |
| DRSC26633            | 1                  | MED16       | THRAP5                  | 0                    |
| DRSC26650            | 3                  | beta'Cop    | COPB2                   | 0                    |
| DRSC26462            | 2                  | CG13298     | SF3B14                  | 0                    |
| DRSC26839            | 2                  | CG14641     | RBM22                   | 0                    |
| DRSC26931            | 1                  | zfh1        | ZEB1                    | 0                    |
| DRSC27065            | 1                  | CG1109      | WDR33                   | 0                    |
| DRSC26760            | 2                  | sop         | RPS2                    | 0                    |
| DRSC27111            | 2                  | Rpb11       | POLR2J                  | 0                    |
| DRSC27157            | 3                  | RpII215     | POLR2A                  | 0                    |
| DRSC28179            | 2                  | Klp61F      | KIF11                   | 0                    |
| DRSC21247            | 1                  | Hsp70Bb     | Hsp70Bb                 | 7                    |
| DRSC01103            | 1                  | CG5853      |                         | 1                    |
| DRSC21249            | 1                  | LysD        | LYZ                     | 3                    |
| DRSC05782            | 1                  | CG33453     |                         | 2                    |
| DRSC05070            | 1                  | CG30379     |                         | 0                    |
| DRSC05621            | 1                  | CG30463     |                         | 9                    |
| DRSC03948            | 1                  | Dnr1        | MYLIP                   | 0                    |
| DRSC25542            | 1                  | CG14934     |                         | 0                    |
| DRSC24497            | 1                  | CG17751     |                         | 0                    |
| DRSC26265            | 1                  | CG17752     |                         | 0                    |
| DRSC28203            | 1                  | CG9772      | SKP2                    | 0                    |

|           |   |           |         |     |
|-----------|---|-----------|---------|-----|
| DRSC28078 | 3 | Pros25    | PSMA2   | 0   |
| DRSC28391 | 1 | RpL19     | RPL19   | 0   |
| DRSC28279 | 2 | Rpn5      | PSMD12  | 0   |
| DRSC28558 | 1 | RpS13     | RPS13   | 0   |
| DRSC28234 | 1 | oho23B    | RPS21   | 0   |
| DRSC28394 | 2 | Pp2A-29B  | PPP2R1A | 0   |
| DRSC28510 | 1 | RpLP2     | RPLP2   | 0   |
| DRSC28578 | 1 | CG14636   |         | 0   |
| DRSC28589 | 2 | Rpn12     | PSMD8   | 0   |
| DRSC29446 | 3 | Dox-A2    | PSMD3   | 0   |
| DRSC29788 | 1 | Snap      | NAPA    | 0   |
| DRSC29742 | 2 | TfIIFbeta | GTF2F2  | 0   |
| DRSC30006 | 1 | CG15609   | EHBP1   | 0   |
| DRSC00708 | 2 | lilli     |         | 0   |
| DRSC00268 | 1 | CG3523    | FASN    | 5   |
| DRSC03342 | 2 | Hel25E    | BAT1    | 1   |
| DRSC03492 | 2 | beta'Cop  | COPB2   | 1   |
| DRSC03207 | 1 | CG31673   |         | 0   |
| DRSC04697 | 1 | l(2)dtl   |         | 1   |
| DRSC07542 | 3 | Rpt1      | PSMC2   | 0   |
| DRSC07324 | 1 | CG9027    |         | 0   |
| DRSC07129 | 1 | CG8257    | CARS2   | 0   |
| DRSC07552 | 1 | Sin3A     | SIN3A   | 0   |
| DRSC06854 | 2 | NAT1      | EIF4G2  | 1   |
| DRSC07246 | 2 | lig       | UBAP2   | 223 |
| DRSC07447 | 2 | Jra       | JUND    | 0   |
| DRSC26038 | 1 | CG2843    | CCDC49  | 0   |
| DRSC26580 | 1 | CG7990    |         | 0   |
| DRSC26616 | 1 | p130CAS   | BCAR1   | 0   |
| DRSC26626 | 1 | Fak56D    | PTK2    | 0   |
| DRSC26726 | 1 | CG11926   | MON1A   | 0   |
| DRSC26676 | 1 | CG4196    | TMEM165 | 0   |
| DRSC27057 | 1 | CG30087   | KLK6    | 0   |
| DRSC07059 | 2 | CG8046    |         | 0   |
| DRSC07293 | 2 | prp8      | PRPF8   | 0   |
| DRSC07159 | 2 | l(2)05070 | PSMB6   | 0   |
| DRSC08235 | 1 | MED14     | CRSP2   | 6   |
| DRSC06023 | 1 | CG11007   | TXNDC14 | 0   |
| DRSC11122 | 1 | CrebA     |         | 0   |
| DRSC12186 | 3 | Prosbeta4 | PSMB4   | 0   |
| DRSC11285 | 1 | Snap      | NAPA    | 1   |
| DRSC11775 | 1 | CG5282    |         | 0   |
| DRSC12227 | 2 | CG14641   | RBM22   | 1   |
| DRSC09988 | 1 | CG13380   |         | 0   |
| DRSC11404 | 3 | th        |         | 0   |
| DRSC10954 | 3 | Su(Tpl)   | ELL2    | 1   |
| DRSC16107 | 1 | CG6752    | RNF123  | 0   |
| DRSC16831 | 2 | RpII140   | POLR2B  | 0   |
| DRSC16133 | 2 | Fer3      |         | 2   |

|           |   |                  |         |   |
|-----------|---|------------------|---------|---|
| DRSC15166 | 2 | CG16941          | SF3A1   | 0 |
| DRSC27103 | 1 | bgm              | ACSBG2  | 0 |
| DRSC26876 | 1 | mRpL44           | MRPL44  | 0 |
| DRSC27253 | 1 | CG31523          |         | 0 |
| DRSC27135 | 1 | CG5720           | ZC3H14  | 0 |
| DRSC27264 | 1 | mRpL40           | MRPL40  | 0 |
| DRSC27518 | 1 | Ugt35b           | UGT2B17 | 0 |
| DRSC27631 | 1 | CG15525          | CCDC12  | 0 |
| DRSC28007 | 1 | Ntl              |         | 0 |
| DRSC28015 | 1 | CG33255, CR32205 |         | 8 |
| DRSC28055 | 1 | SNF1A            | PRKAA2  | 0 |
| DRSC28874 | 1 | ine              |         | 0 |
| DRSC28927 | 1 | Corin            |         | 0 |
| DRSC16223 | 2 | Rrp6             | EXOSC10 | 0 |
| DRSC16801 | 2 | Prosbeta3        | PSMB3   | 0 |
| DRSC16068 | 2 | Rpb7             | POLR2G  | 0 |
| DRSC12608 | 1 | TfIIIFalpha      | GTF2F1  | 5 |
| DRSC14594 | 1 | RpI12            | ZNRD1   | 1 |
| DRSC16799 | 3 | Pros26.4         | PSMC1   | 2 |
| DRSC16810 | 2 | Rab7             | RAB7A   | 0 |
| DRSC15948 | 1 | CG6015           | CDC40   | 0 |
| DRSC16150 | 2 | Nup133           | NUP133  | 0 |
| DRSC16842 | 1 | Tbp-1            | PSMC3   | 1 |
| DRSC16006 | 1 | CG6271           |         | 5 |
| DRSC16841 | 3 | Rpn7             | PSMD6   | 1 |
| DRSC18482 | 1 | Suv4-20          |         | 7 |
| DRSC18712 | 1 | RpS6             | RPS6    | 4 |
| DRSC17135 | 2 | gw               | TNRC6C  | 0 |
| DRSC16839 | 3 | Rpn2             | PSMD1   | 0 |
| DRSC17148 | 3 | MED26            |         | 0 |
| DRSC17743 | 3 | Bx42             | SNW1    | 1 |
| DRSC20158 | 3 | Stim             | STIM1   | 0 |
| DRSC20280 | 3 | RpII215          | POLR2A  | 1 |
| DRSC19450 | 1 | e(y)3            |         | 3 |
| DRSC20312 | 1 | betaCop          | COPB1   | 1 |
| DRSC00535 | 3 | CG2807           | SF3B1   | 0 |
| DRSC00713 | 1 | CG8840           |         | 0 |
| DRSC03422 | 2 | Rpn11            | PSMD14  | 0 |
| DRSC03356 | 1 | Kr-h2            | TMEM33  | 0 |
| DRSC03546 | 3 | hoip             | NHP2L1  | 0 |
| DRSC03401 | 2 | Pros35           | PSMA1   | 0 |
| DRSC03454 | 2 | TfIIB            | GTF2B   | 0 |
| DRSC02774 | 2 | CG4738           | NUP160  | 0 |
| DRSC28920 | 1 | Ocho             |         | 0 |
| DRSC29264 | 1 | Caps             | CADPS   | 0 |
| DRSC29101 | 1 | Dscam            | DSCAML1 | 0 |
| DRSC29097 | 1 | CG5151           |         | 0 |
| DRSC29153 | 1 | CG9507           |         | 0 |
| DRSC29578 | 1 | sli              | SLIT2   | 0 |

|           |   |            |          |   |
|-----------|---|------------|----------|---|
| DRSC29379 | 1 | CG8828     |          | 0 |
| DRSC29452 | 1 | CG17264    |          | 0 |
| DRSC29640 | 1 | Toll-7     |          | 0 |
| DRSC00546 | 1 | Trn-SR     | TNPO3    | 0 |
| DRSC02678 | 1 | CG18585    | CPA2     | 0 |
| DRSC00692 | 1 | mio        | FLJ20323 | 0 |
| DRSC00626 | 1 | CG3662     |          | 0 |
| DRSC02639 | 1 | CG17904    | NUBP1    | 0 |
| DRSC03411 | 1 | RfC3       | RFC5     | 0 |
| DRSC03318 | 3 | Dox-A2     | PSMD3    | 0 |
| DRSC03513 | 1 | crc        |          | 0 |
| DRSC04644 | 1 | Pros29     | PSMA4    | 0 |
| DRSC04506 | 2 | MED16      | THRAP5   | 2 |
| DRSC04838 | 2 | BubR1      |          | 0 |
| DRSC04624 | 3 | Mov34      | PSMD7    | 1 |
| DRSC07501 | 1 | Pabp2      | PABPN1   | 0 |
| DRSC06100 | 2 | Rpb5       | POLR2E   | 0 |
| DRSC08671 | 3 | Klp61F     | KIF11    | 6 |
| DRSC07660 | 2 | par-1      | MARK3    | 0 |
| DRSC08695 | 3 | RpL8       | RPL8     | 1 |
| DRSC08532 | 3 | RpL8       | RPL8     | 1 |
| DRSC07540 | 2 | RpS18      | RPS18    | 0 |
| DRSC08721 | 3 | mge        | TOMM22   | 0 |
| DRSC10944 | 1 | MED24      | THRAP4   | 0 |
| DRSC11182 | 2 | HLH106     | SREBF1   | 0 |
| DRSC12366 | 3 | RpII18     | POLR2F   | 3 |
| DRSC12205 | 3 | MED27      | CRSP8    | 0 |
| DRSC11946 | 1 | CklIalpha  | CSNK2A1  | 0 |
| DRSC16059 | 2 | MED7       | CRSP9    | 1 |
| DRSC02953 | 1 | CG6412     | TSFM     | 2 |
| DRSC03455 | 1 | TfIIS      | TCEA1    | 4 |
| DRSC02200 | 1 | mRpL51     |          | 1 |
| DRSC02161 | 1 | JhI-21     | SLC7A5   | 1 |
| DRSC04699 | 1 | l(2)k09913 |          | 0 |
| DRSC06805 | 1 | CG30496    | GLMN     | 0 |
| DRSC04288 | 1 | Eps-15     | EPS15L1  | 0 |
| DRSC04327 | 1 | thoc5      | THOC5    | 0 |
| DRSC04478 | 1 | CG4612     |          | 0 |
| DRSC04249 | 1 | CG15658    |          | 0 |
| DRSC04722 | 1 | uzip       |          | 1 |
| DRSC06803 | 1 | CG1942     |          | 0 |
| DRSC07007 | 1 | CG6701     |          | 0 |
| DRSC09787 | 1 | CG10724    | WDR1     | 0 |
| DRSC10528 | 1 | thoc6      | THOC6    | 0 |
| DRSC14460 | 2 | CG11985    | SF3B5    | 0 |
| DRSC16832 | 3 | RpII15     | POLR2I   | 0 |
| DRSC15378 | 2 | mor        | SMARCC2  | 1 |
| DRSC16798 | 2 | Pros25     | PSMA2    | 0 |
| DRSC15890 | 3 | CG5844     |          | 0 |

|           |   |                |           |     |
|-----------|---|----------------|-----------|-----|
| DRSC16955 | 3 | gammaCop       |           | 0   |
| DRSC17168 | 3 | RpS3A          | RPS3A     | 0   |
| DRSC14729 | 1 | Slu7           | SLU7      | 1   |
| DRSC18116 | 3 | CG1677         | NHN1      | 0   |
| DRSC18713 | 3 | Rpt4           | PSMC6     | 0   |
| DRSC17794 | 2 | CR11700        |           | 3   |
| DRSC20283 | 3 | Rpt3           | PSMC4     | 3   |
| DRSC00708 | 3 | lilli          |           | 0   |
| DRSC22061 | 3 | olf186-F       | TMEM142A  | 0   |
| DRSC22819 | 1 | RpL22          | RPL22     | 8   |
| DRSC23203 | 2 | sima           |           | 1   |
| DRSC18835 | 1 | snf            | SNRPA     | 0   |
| DRSC20572 | 1 | Rab10          | RAB10     | 2   |
| DRSC20526 | 2 | CG15455        | RUNX2     | 385 |
| DRSC20483 | 2 | CG11566        |           | 0   |
| DRSC19555 | 3 | CG14200        |           | 736 |
| DRSC20029 | 1 | CG34422        | ARID4B    | 0   |
| DRSC20039 | 2 | CG7349         |           | 0   |
| DRSC01084 | 1 | CG31882        |           | 0   |
| DRSC20490 | 1 | CG12565        |           | 0   |
| DRSC05050 | 2 | CG11166        |           | 293 |
| DRSC07746 | 1 | CG40290        |           | 3   |
| DRSC07992 | 1 | dos            |           | 193 |
| DRSC01577 | 2 | beat-IIIa      |           | 0   |
| DRSC05460 | 1 | shot           | MACF1     | 1   |
| DRSC08896 | 2 | Pdp1           | HLF       | 417 |
| DRSC08897 | 3 | Pdp1           | HLF       | 879 |
| DRSC08464 | 1 | CG15011        | NFXL1     | 0   |
| DRSC10540 | 1 | orb2           | CPEB4     | 1   |
| DRSC08204 | 1 | VhaM9.7-1      |           | 1   |
| DRSC08591 | 1 | Syx17          | STX17     | 0   |
| DRSC11298 | 1 | Taf2           | TAF2      | 2   |
| DRSC09674 | 1 | CG7207         | COL4A3BP  | 0   |
| DRSC10512 | 1 | PGRP-L         | TMEM11    | 0   |
| DRSC10565 | 1 | CG5989         | LETMD1    | 0   |
| DRSC09772 | 1 | CG10671        | C20orf142 | 1   |
| DRSC08693 | 1 | Rop            | STXBP1    | 2   |
| DRSC11207 | 1 | LanA           | LAMA5     | 0   |
| DRSC12189 | 1 | CG12007        | RABGGTA   | 0   |
| DRSC11800 | 1 | DNApol-eta     | POLH      | 0   |
| DRSC11755 | 1 | CG4365         | HAGH      | 0   |
| DRSC12164 | 1 | Hph            | EGLN1     | 1   |
| DRSC12199 | 1 | CG12170        | OXSM      | 0   |
| DRSC11223 | 1 | Mipp1          |           | 0   |
| DRSC13664 | 2 | nAcRalpha-96Aa | CHRNA3    | 300 |
| DRSC09230 | 1 | CG17672        |           | 603 |
| DRSC17126 | 1 | MED26          |           | 0   |
| DRSC19214 | 3 | Sh             | KCNA2     | 717 |
| DRSC24702 | 1 | CG11905        |           | 0   |

|           |   |            |           |     |
|-----------|---|------------|-----------|-----|
| DRSC24787 | 2 | CG10081    |           | 0   |
| DRSC23582 | 1 | Slu7       | SLU7      | 0   |
| DRSC25381 | 2 | Ald        |           | 0   |
| DRSC24271 | 2 | CG13213    | FBXL6     | 0   |
| DRSC23615 | 1 | MED15      | PCQAP     | 0   |
| DRSC23497 | 2 | gw         | TNRC6C    | 0   |
| DRSC23458 | 2 | MED19      | MED19     | 0   |
| DRSC23439 | 2 | Fs(2)Ket   | KPNB1     | 0   |
| DRSC25012 | 2 | Pros26.4   | PSMC1     | 0   |
| DRSC23578 | 3 | desat1     |           | 0   |
| DRSC25113 | 1 | disco      |           | 0   |
| DRSC25532 | 1 | HLHmgamma  |           | 0   |
| DRSC23698 | 1 | e(y)3      |           | 1   |
| DRSC25108 | 2 | lark       | RBM4B     | 0   |
| DRSC23905 | 1 | Gbp        | PRPF19    | 0   |
| DRSC25105 | 2 | Hsc70-3    | HSPA5     | 0   |
| DRSC24015 | 1 | Hsc70-5    | HSPA9     | 0   |
| DRSC01101 | 1 | CG33300    |           | 1   |
| DRSC20576 | 1 | cactin     | C19orf29  | 1   |
| DRSC01236 | 1 | aret       | CUGBP2    | 500 |
| DRSC20678 | 2 | CG12655    |           | 0   |
| DRSC01162 | 2 | CG32830    |           | 438 |
| DRSC21265 | 3 | CG33870    | HIST2H2BF | 1   |
| DRSC19487 | 1 | CG12702    |           | 1   |
| DRSC20963 | 2 | RpL15      |           | 0   |
| DRSC21267 | 3 | CG33818    | HIST1H3I  | 1   |
| DRSC20967 | 2 | CG13865    |           | 0   |
| DRSC05553 | 2 | CG30470    |           | 210 |
| DRSC07955 | 2 | CG7971     | SRRM2     | 0   |
| DRSC11632 | 1 | Mes2       |           | 1   |
| DRSC12583 | 1 | CG31493    |           | 0   |
| DRSC15179 | 1 | CG17184    | ARFIP2    | 1   |
| DRSC16968 | 1 | htl        | FGFR3     | 0   |
| DRSC12517 | 1 | CG10277    | RNF13     | 1   |
| DRSC16647 | 1 | Dhod       | DHODH     | 0   |
| DRSC16207 | 1 | CG7156     | RPS6KC1   | 2   |
| DRSC16087 | 1 | CG6660     |           | 0   |
| DRSC14393 | 1 | CG11820    |           | 0   |
| DRSC16709 | 1 | Hrb98DE    | HNRPA1    | 2   |
| DRSC18393 | 1 | CG5941     |           | 0   |
| DRSC18760 | 1 | deltaCOP   | ARCN1     | 1   |
| DRSC18746 | 1 | brn        | B3GALT2   | 0   |
| DRSC16929 | 1 | dco        | CSNK1E    | 1   |
| DRSC19331 | 1 | Anxb11     | ANXA7     | 2   |
| DRSC00746 | 1 | Clp        | CPSF4     | 0   |
| DRSC00813 | 1 | dpp        | ARCN1     | 1   |
| DRSC20625 | 1 | CG14613    | C18orf19  | 2   |
| DRSC13081 | 2 | Su(var)3-9 | EIF2S3    | 0   |
| DRSC13742 | 1 | CG14550    |           | 0   |



|           |   |                |         |     |
|-----------|---|----------------|---------|-----|
| DRSC12447 | 1 | Alh            | MLLT10  | 611 |
| DRSC13530 | 1 | CG31353        |         | 467 |
| DRSC13637 | 1 | CG31468        |         | 0   |
| DRSC08991 | 3 | CG32048        |         | 722 |
| DRSC13017 | 3 | foxo           | FOXO3   | 675 |
| DRSC13176 | 1 | bxd            |         | 1   |
| DRSC09116 | 1 | CG33272        |         | 21  |
| DRSC09263 | 2 | sens           |         | 479 |
| DRSC11593 | 1 | Mes2           |         | 0   |
| DRSC13670 | 3 | nAcRalpha-96Aa | CHRNA3  | 103 |
| DRSC17638 | 2 | Hk             | KCNAB1  | 51  |
| DRSC17689 | 1 | CG32808        |         | 1   |
| DRSC30091 | 1 | Taf10          | TAF10   | 0   |
| DRSC30085 | 1 | CG32572        |         | 0   |
| DRSC25162 | 1 | alphaTub67C    |         | 0   |
| DRSC25011 | 2 | alphaTub84B    | TUBA1A  | 1   |
| DRSC24030 | 2 | CG10777        | DDX17   | 0   |
| DRSC23438 | 3 | Cdc27          | CDC27   | 0   |
| DRSC25556 | 2 | c12.1          | HSPC148 | 0   |
| DRSC23424 | 2 | alphaTub85E    | TUBA1C  | 0   |
| DRSC24096 | 1 | CAP-D2         | NCAPD2  | 0   |
| DRSC23516 | 2 | betaTub56D     | TUBB2C  | 4   |
| DRSC23384 | 2 | CR11700        |         | 3   |
| DRSC24030 | 1 | CG10777        | DDX17   | 0   |
| DRSC24093 | 1 | CG12309        |         | 0   |
| DRSC23475 | 2 | Tango4         | PLRG1   | 0   |
| DRSC24431 | 2 | CG31554        |         | 0   |
| DRSC24568 | 1 | CG32233        |         | 0   |
| DRSC25542 | 1 | CG14934        |         | 0   |
| DRSC24497 | 1 | CG17751        |         | 0   |
| DRSC25405 | 1 | CG16884        |         | 0   |
| DRSC23464 | 2 | CG34339        |         | 0   |
| DRSC25068 | 3 | CG6842         | VPS4B   | 0   |
| DRSC25071 | 1 | TwdlB          |         | 3   |
| DRSC23667 | 2 | CG9667         | ISY1    | 0   |
| DRSC03443 | 1 | Ssb-c31a       |         | 0   |
| DRSC03036 | 1 | Hsp60C         |         | 0   |
| DRSC02832 | 1 | CG5261         | DLAT    | 22  |
| DRSC02921 | 1 | CG6012         |         | 0   |
| DRSC06185 | 1 | Tsp42En        |         | 0   |
| DRSC07118 | 1 | CG8235         | SCYE1   | 0   |
| DRSC04463 | 1 | mRpS17         |         | 0   |
| DRSC07695 | 1 | san            | NAT13   | 0   |
| DRSC06135 | 1 | CG12343        | SYF2    | 0   |
| DRSC07220 | 1 | CG8594         | CLCN7   | 0   |
| DRSC06675 | 1 | GstE5          |         | 0   |
| DRSC08307 | 2 | mRpL23         | MRPL23  | 0   |
| DRSC07665 | 1 | plu            |         | 0   |
| DRSC08634 | 1 | FucTD          |         | 0   |

|           |   |          |                   |    |
|-----------|---|----------|-------------------|----|
| DRSC10339 | 1 | CG18769  | CCDC109A          | 0  |
| DRSC23458 | 2 | MED19    | MED19             | 0  |
| DRSC24354 | 1 | CG5389   |                   | 0  |
| DRSC24518 | 1 | CG6966   | FEM1C             | 0  |
| DRSC24340 | 1 | CG9001   |                   | 0  |
| DRSC24291 | 2 | ear      | MLLT3             | 0  |
| DRSC25054 | 1 | DebB     | SNRPF             | 2  |
| DRSC24508 | 2 | Hrb98DE  | HNRPA1            | 0  |
| DRSC23350 | 2 | Pcf11    |                   | 0  |
| DRSC25063 | 1 | mask     |                   | 0  |
| DRSC25213 | 2 | Rbf      | RBL1              | 0  |
| DRSC23541 | 2 | RnrS     | RRM2              | 0  |
| DRSC23412 | 3 | Rpt3     | PSMC4             | 0  |
| DRSC25607 | 2 | Stam     | STAM              | 0  |
| DRSC25961 | 3 | deltaCOP | ARCN1             | 0  |
| DRSC23584 | 2 | RpII33   | POLR2C            | 0  |
| DRSC25982 | 1 | RpL6     | RPL6              | 0  |
| DRSC25025 | 2 | RpL22    | RPL22             | 0  |
| DRSC25051 | 1 | RpL37A   | RPL37A            | 0  |
| DRSC23625 | 3 | vih      | UBE2C             | 0  |
| DRSC24322 | 1 | sut3     |                   | 0  |
| DRSC24141 | 3 | sar1     | SAR1B             | 0  |
| DRSC26043 | 2 | eIF-4a   | EIF4A2            | 0  |
| DRSC26155 | 1 | CG9769   | EIF3S5, hCG_15200 | 0  |
| DRSC26195 | 3 | Ca-P60A  | ATP2A1            | 0  |
| DRSC26313 | 2 | RpS23    | RPS23             | 0  |
| DRSC26257 | 2 | CG13841  |                   | 0  |
| DRSC26259 | 2 | SmB      | SNRPB             | 0  |
| DRSC08225 | 1 | CG12017  |                   | 4  |
| DRSC10235 | 1 | CG16998  |                   | 0  |
| DRSC10896 | 1 | mRpL2    | MRPL2             | 0  |
| DRSC10399 | 1 | CG4098   | NUDT9             | 0  |
| DRSC09778 | 1 | vih      | UBE2C             | 3  |
| DRSC15443 | 1 | CG31473  |                   | 1  |
| DRSC12307 | 1 | Xe7      | CXYorf3           | 0  |
| DRSC16245 | 1 | Ctr1B    |                   | 0  |
| DRSC14531 | 1 | dpr4     |                   | 3  |
| DRSC16827 | 1 | Rlc1     | MRPL47            | 0  |
| DRSC16393 | 1 | CG8165   | JMJD1B            | 1  |
| DRSC16611 | 2 | CoVa     | COX5A             | 0  |
| DRSC15678 | 1 | mRpL9    | MRPL9             | 1  |
| DRSC15582 | 1 | CG4459   |                   | 0  |
| DRSC15606 | 1 | ire-1    | ERN1              | 0  |
| DRSC17018 | 1 | nos      |                   | 26 |
| DRSC26217 | 2 | RpL11    | RPL11             | 0  |
| DRSC26226 | 2 | brm      | SMARCA4           | 0  |
| DRSC26265 | 1 | CG17752  |                   | 0  |
| DRSC26038 | 1 | Cwc25    | CCDC49            | 0  |
| DRSC26371 | 1 | CG8765   |                   | 0  |

|           |   |           |          |    |
|-----------|---|-----------|----------|----|
| DRSC26396 | 2 | Nup154    | NUP155   | 0  |
| DRSC27099 | 2 | CG33854   | HIST1H3I | 0  |
| DRSC26988 | 1 | RpL10Ab   | RPL10A   | 0  |
| DRSC26990 | 1 | mip130    | LIN9     | 0  |
| DRSC27324 | 1 | l(2)NC136 | CNOT3    | 0  |
| DRSC27177 | 2 | Rpn9      | PSMD13   | 0  |
| DRSC27185 | 2 | cul-4     | CUL4B    | 0  |
| DRSC28104 | 3 | CG6015    | CDC40    | 0  |
| DRSC27945 | 1 | CG4119    |          | 0  |
| DRSC27971 | 1 | Pop2      | CNOT7    | 0  |
| DRSC27980 | 2 | mor       | SMARCC2  | 0  |
| DRSC28422 | 2 | cact      | NFKBIA   | 0  |
| DRSC28348 | 2 | Hel25E    | BAT1     | 0  |
| DRSC28468 | 2 | RpS7      | RPS7     | 0  |
| DRSC28510 | 2 | RpLP2     | RPLP2    | 0  |
| DRSC28442 | 2 | tomboy40  |          | 0  |
| DRSC28396 | 2 | CG1957    | CPSF2    | 1  |
| DRSC28412 | 1 | RpS24     | RPS24    | 0  |
| DRSC28481 | 2 | eIF3-S10  | EIF3S10  | 0  |
| DRSC28414 | 1 | CG3281    |          | 0  |
| DRSC28431 | 2 | Tao-1     | TAOK1    | 0  |
| DRSC28523 | 1 | Arpc3B    |          | 0  |
| DRSC28871 | 1 | CG32666   | STK17A   | 0  |
| DRSC28833 | 3 | RpL7A     | RPL7A    | 0  |
| DRSC28784 | 2 | RpII18    | POLR2F   | 0  |
| DRSC28626 | 1 | tho2      | THOC2    | 0  |
| DRSC28794 | 2 | sima      |          | 0  |
| DRSC28822 | 2 | dalao     | SMARCE1  | 0  |
| DRSC28874 | 1 | ine       |          | 0  |
| DRSC28927 | 1 | Corin     |          | 0  |
| DRSC28920 | 1 | Ocho      |          | 0  |
| DRSC29087 | 3 | CG30382   | PSMA6    | 0  |
| DRSC29116 | 1 | pnt       |          | 0  |
| DRSC29232 | 2 | MED7      | CRSP9    | 0  |
| DRSC16590 | 1 | CG9996    | GLT8D4   | 0  |
| DRSC14436 | 1 | CG11910   |          | 0  |
| DRSC16028 | 1 | CG6364    | UCK2     | 0  |
| DRSC16326 | 1 | CG31038   |          | 3  |
| DRSC18560 | 1 | Unc-76    | FEZ2     | 3  |
| DRSC18382 | 1 | CG4857    |          | 2  |
| DRSC18686 | 1 | ND75      | NDUFS1   | 0  |
| DRSC18355 | 1 | Sas10     | SAS10    | 0  |
| DRSC17886 | 1 | CG16752   |          | 0  |
| DRSC18368 | 1 | CG4557    | TMF1     | 3  |
| DRSC19778 | 1 | CG32666   | STK17A   | 80 |
| DRSC19355 | 1 | CG10362   | PDZD8    | 7  |
| DRSC19359 | 1 | CG10617   | SYT12    | 0  |
| DRSC19425 | 1 | CG34348   | TMEM68   | 0  |
| DRSC29245 | 1 | hkl       |          | 0  |

|           |   |           |          |    |
|-----------|---|-----------|----------|----|
| DRSC29264 | 1 | Caps      | CADPS    | 0  |
| DRSC29097 | 1 | CG5151    |          | 0  |
| DRSC29153 | 1 | CG9507    |          | 0  |
| DRSC29315 | 2 | ps        | NOVA1    | 0  |
| DRSC29393 | 1 | Elongin-C | TCEB1    | 0  |
| DRSC29510 | 1 | mRpL16    | MRPL16   | 0  |
| DRSC29504 | 2 | ncm       | KIAA1604 | 0  |
| DRSC29337 | 3 | CG5245    | LOC91664 | 0  |
| DRSC29362 | 2 | CG1244    |          | 0  |
| DRSC29538 | 1 | CG3016    | USP30    | 0  |
| DRSC29851 | 3 | Rab1      | RAB1A    | 0  |
| DRSC30020 | 1 | CG33885   | HIST1H4A | 0  |
| DRSC29794 | 1 | geminin   |          | 0  |
| DRSC29787 | 1 | l(2)08717 |          | 0  |
| DRSC29803 | 2 | sbr       | NXF1     | 0  |
| DRSC29772 | 3 | Nup358    |          | 0  |
| DRSC29872 | 1 | CG17168   |          | 0  |
| DRSC29897 | 3 | Mov34     | PSMD7    | 0  |
| DRSC29905 | 2 | RpL8      | RPL8     | 0  |
| DRSC30026 | 3 | MED30     | THRAP6   | 0  |
| DRSC29708 | 1 | CG8241    | DHX8     | 0  |
| DRSC29702 | 2 | Snx6      | SNX6     | 0  |
| DRSC03080 | 2 | Pvr       |          | 0  |
| DRSC03355 | 1 | Kr-h1     |          | 12 |
| DRSC00612 | 2 | CG3542    | PRPF40A  | 0  |
| DRSC03574 | 2 | mts       | PPP2CB   | 0  |
| DRSC03419 | 1 | RpS13     | RPS13    | 1  |
| DRSC00267 | 2 | MED15     | PCQAP    | 46 |
| DRSC00619 | 3 | CG3605    | SF3B2    | 0  |
| DRSC03328 | 3 | Fs(2)Ket  | KPNB1    | 2  |
| DRSC03629 | 1 | und       | METAP2   | 0  |
| DRSC02551 | 1 | CG16974   |          | 2  |
| DRSC02071 | 1 | CG10570   |          | 1  |
| DRSC02179 | 2 | ncm       | KIAA1604 | 1  |
| DRSC01991 | 1 | CG31705   |          | 1  |
| DRSC03437 | 2 | SmB       | SNRPB    | 1  |
| DRSC01936 | 1 | CG4891    |          | 1  |
| DRSC02161 | 1 | JhI-21    | SLC7A5   | 1  |
| DRSC03569 | 2 | me31B     | DDX6     | 0  |
| DRSC03432 | 2 | Syx5      | STX5     | 0  |
| DRSC03201 | 3 | Pomp      |          | 1  |
| DRSC03415 | 2 | RpII33    | POLR2C   | 1  |
| DRSC04456 | 2 | CG4266    | SFRS15   | 0  |
| DRSC18205 | 1 | CG2111    |          | 1  |
| DRSC19354 | 1 | CG10353   | TMEM16B  | 1  |
| DRSC19746 | 1 | Pde9      |          | 0  |
| DRSC20357 | 1 | nonA      | SFPQ     | 3  |
| DRSC20112 | 1 | CG8565    |          | 0  |
| DRSC19984 | 1 | Rad51D    |          | 1  |

|           |   |            |           |    |
|-----------|---|------------|-----------|----|
| DRSC19452 | 1 | CG33173    |           | 0  |
| DRSC10087 | 1 | fz2        | FZD8      | 3  |
| DRSC21461 | 1 | Ten-a      | ODZ1      | 9  |
| DRSC21562 | 1 | Dscam      | DSCAML1   | 0  |
| DRSC04053 | 1 | CG10080    | VPRBP     | 0  |
| DRSC04476 | 3 | CG4589     | LETM1     | 0  |
| DRSC04649 | 1 | RpL19      | RPL19     | 1  |
| DRSC04600 | 3 | Ca-P60A    | ATP2A1    | 1  |
| DRSC04908 | 2 | l(2)NC136  | CNOT3     | 2  |
| DRSC04478 | 1 | CG4612     |           | 0  |
| DRSC04285 | 1 | key        |           | 0  |
| DRSC06805 | 1 | CG30496    | GLMN      | 0  |
| DRSC06803 | 1 | CG1942     |           | 0  |
| DRSC07516 | 3 | Prosalpha7 | PSMA3     | 1  |
| DRSC07007 | 1 | CG6701     |           | 0  |
| DRSC07442 | 1 | Hsc70-5    | HSPA9     | 2  |
| DRSC07515 | 3 | Prosalpha6 | PSMA6     | 1  |
| DRSC06794 | 3 | Not1       | CNOT1     | 0  |
| DRSC07533 | 1 | RnrS       | RRM2      | 1  |
| DRSC07169 | 2 | RpS23      | RPS23     | 1  |
| DRSC07541 | 3 | Rpn6       | PSMD11    | 0  |
| DRSC07477 | 2 | Nacalpa    | NACA      | 2  |
| DRSC07120 | 1 | CG8241     | DHX8      | 1  |
| DRSC07293 | 1 | prp8       | PRPF8     | 0  |
| DRSC07249 | 2 | CG11198    | ACACA     | 0  |
| DRSC07243 | 2 | cul-4      | CUL4B     | 0  |
| DRSC07696 | 2 | spt4       | SUPT4H1   | 0  |
| DRSC07128 | 2 | l(2)k05713 | GPD2      | 0  |
| DRSC07537 | 2 | RpL11      | RPL11     | 2  |
| DRSC07036 | 1 | CG7744     |           | 0  |
| DRSC07659 | 3 | pAbp       | PABPC1    | 0  |
| DRSC08154 | 3 | CG1017     | MFAP1     | 2  |
| DRSC08370 | 3 | CG13900    | SF3B3     | 0  |
| DRSC07302 | 1 | CG8963     | PAIP1     | 53 |
| DRSC07514 | 3 | ProsMA5    | PSMA5     | 0  |
| DRSC08706 | 3 | alphaCop   | COPA      | 0  |
| DRSC08577 | 2 | CG6905     | CDC5L     | 0  |
| DRSC07000 | 2 | Bap55      | ACTL6B    | 0  |
| DRSC11257 | 3 | Prosbeta2  | PSMB7     | 0  |
| DRSC10537 | 2 | Pop2       | CNOT7     | 1  |
| DRSC11112 | 3 | Cdc27      | CDC27     | 1  |
| DRSC09772 | 1 | CG10671    | C20orf142 | 1  |
| DRSC11014 | 2 | MED4       | MED4      | 3  |
| DRSC08207 | 2 | CG11594    | FLJ10986  | 0  |
| DRSC11270 | 2 | RpS12      | RPS12     | 0  |
| DRSC11124 | 2 | CycT       | CCNT1     | 26 |
| DRSC11755 | 1 | CG4365     | HAGH      | 0  |
| DRSC12162 | 3 | CG1109     | WDR33     | 0  |
| DRSC11632 | 1 | Mes2       |           | 1  |

|           |   |         |           |    |
|-----------|---|---------|-----------|----|
| DRSC10899 | 2 | Tom20   | TOMM20    | 0  |
| DRSC12147 | 3 | CG1078  |           | 0  |
| DRSC10516 | 2 | MED19   | MED19     | 28 |
| DRSC12367 | 2 | Rpn5    | PSMD12    | 1  |
| DRSC12365 | 3 | Rm62    |           | 2  |
| DRSC10722 | 1 | CG6836  |           | 1  |
| DRSC12203 | 1 | CG1236  | GRHPR     | 0  |
| DRSC11274 | 3 | Rpn1    | PSMD2     | 0  |
| DRSC12164 | 1 | Hph     | EGLN1     | 1  |
| DRSC12199 | 1 | CG12170 | OXSM      | 0  |
| DRSC12301 | 3 | CG2097  | SYMPK     | 1  |
| DRSC11223 | 1 | Mipp1   |           | 0  |
| DRSC12369 | 2 | Snr1    | SMARCB1   | 0  |
| DRSC12383 | 3 | noi     | SF3A3     | 1  |
| DRSC12387 | 2 | sec23   | SEC23A    | 0  |
| DRSC11256 | 3 | Pros26  | PSMB1     | 0  |
| DRSC12536 | 3 | snRNP2  | SNRPD2    | 1  |
| DRSC10559 | 3 | CG5931  | ASCC3L1   | 0  |
| DRSC11224 | 1 | Mo25    | CAB39L    | 0  |
| DRSC11324 | 1 | asf1    | ASF1A     | 1  |
| DRSC11642 | 3 | Rpb8    | POLR2H    | 0  |
| DRSC11808 | 2 | MED1    | PPARBP    | 0  |
| DRSC11874 | 2 | Pitslre |           | 1  |
| DRSC11634 | 1 | Ssl1    | LOC728340 | 0  |
| DRSC11697 | 1 | CG32428 |           | 21 |
| DRSC12567 | 1 | CG33097 |           | 10 |
| DRSC14935 | 3 | CG14712 | POM121    | 0  |
| DRSC17077 | 2 | tgo     | ARNT      | 1  |
| DRSC15675 | 2 | ear     | MLLT3     | 7  |
| DRSC17022 | 2 | osa     | ARID1A    | 1  |
| DRSC16639 | 2 | DDB1    | DDB1      | 0  |
| DRSC15741 | 1 | CG5220  | FTSJ1     | 0  |
| DRSC16215 | 1 | CG7215  | PRDX5     | 0  |
| DRSC16109 | 1 | EloA    | TCEB3     | 7  |
| DRSC16889 | 2 | MED17   | CRSP6     | 0  |
| DRSC14384 | 2 | CG11779 | TIMM44    | 0  |
| DRSC16962 | 2 | gro     | TLE3      | 0  |
| DRSC16034 | 3 | Dis3    | DIS3      | 0  |
| DRSC14886 | 2 | CG14542 | CHMP2A    | 2  |
| DRSC16210 | 1 | CG7183  | C3orf19   | 0  |
| DRSC14209 | 2 | Nup98   |           | 1  |
| DRSC16882 | 1 | TfIIA-L | GTF2A1    | 0  |
| DRSC16840 | 2 | Rpn9    | PSMD13    | 1  |
| DRSC16018 | 2 | mask    |           | 4  |
| DRSC16208 | 2 | CG7168  | COMMD2    | 0  |
| DRSC15895 | 2 | CG5857  | TMEM48    | 0  |
| DRSC14109 | 2 | Ald     |           | 3  |
| DRSC14627 | 1 | CG13625 | BUD13     | 0  |
| DRSC16833 | 3 | RpL4    | RPL4      | 3  |

|           |   |                  |                  |   |
|-----------|---|------------------|------------------|---|
| DRSC17154 | 3 | CG2165           | ATP2B3           | 0 |
| DRSC18748 | 1 | bys              | BYSL             | 0 |
| DRSC18760 | 3 | deltaCOP         | ARCN1            | 1 |
| DRSC17970 | 2 | l(1)G0155        | YKT6             | 0 |
| DRSC14598 | 3 | Gfat2            | GFPT1            | 1 |
| DRSC18293 | 2 | RpL17            | RPL17            | 5 |
| DRSC14146 | 2 | CG1957           | CPSF2            | 0 |
| DRSC21664 | 1 | plexB            | PLXNB1           | 0 |
| DRSC22614 | 1 | IP3K2            |                  | 5 |
| DRSC22218 | 1 | betaTub60D       | TUBB3            | 1 |
| DRSC22814 | 1 | CG12817, CG12420 |                  | 0 |
| DRSC03751 | 1 | CG40169          |                  | 0 |
| DRSC23118 | 1 | CG16947          | RCHY1            | 2 |
| DRSC21271 | 1 | mt:ND6           |                  | 1 |
| DRSC23049 | 1 | mei-P26          |                  | 0 |
| DRSC14168 | 2 | Bub3             | BUB3             | 1 |
| DRSC18755 | 3 | crn              | CRNKL1           | 0 |
| DRSC17012 | 2 | ned              | KIFC1            | 0 |
| DRSC18835 | 1 | snf              | SNRPA            | 0 |
| DRSC16709 | 1 | Hrb98DE          | HNRPA1           | 2 |
| DRSC17098 | 2 | zfh1             | ZEB1             | 6 |
| DRSC19337 | 3 | Bap60            | SMARCD1          | 0 |
| DRSC19338 | 3 | CG6842           | VPS4B            | 2 |
| DRSC19904 | 3 | Nup153           | NUP153           | 0 |
| DRSC20297 | 2 | U2af50           | U2AF2            | 0 |
| DRSC19786 | 3 | Tango4           | PLRG1            | 1 |
| DRSC18420 | 1 | CG7065           |                  | 3 |
| DRSC17818 | 1 | CG12123          |                  | 0 |
| DRSC20229 | 1 | Chc              | CLTC             | 0 |
| DRSC20378 | 2 | sno              | SBNO1            | 0 |
| DRSC20539 | 2 | l(1)G0269        | DULLARD          | 0 |
| DRSC00789 | 2 | Slh              | SCFD1            | 0 |
| DRSC00782 | 1 | RpL40            | UBA52            | 0 |
| DRSC02680 | 2 | CG18591          | SNRPE            | 0 |
| DRSC03463 | 2 | MED20            | TRFP             | 0 |
| DRSC03526 | 2 | eIF-4a           | EIF4A2           | 1 |
| DRSC02739 | 3 | HDC01675         |                  | 0 |
| DRSC01999 | 2 | Nup107           | NUP107           | 0 |
| DRSC03417 | 2 | RpL7             | RPL7, hCG_31916  | 1 |
| DRSC03421 | 2 | RpS27A           | RPS27A           | 0 |
| DRSC02921 | 1 | CG6012           |                  | 0 |
| DRSC02876 | 1 | CG5681           |                  | 2 |
| DRSC02878 | 2 | CG5693           |                  | 0 |
| DRSC02087 | 2 | RpL30            | RPL30            | 0 |
| DRSC03296 | 1 | CycE             | CCNE1            | 0 |
| DRSC02603 | 2 | CG17331          | PSMB2            | 0 |
| DRSC03420 | 1 | RpS26            | RPS26, LOC728937 | 0 |
| DRSC02668 | 2 | Mio              |                  | 0 |
| DRSC04312 | 1 | CG18735          | LOC646960        | 2 |

|           |   |            |                  |    |
|-----------|---|------------|------------------|----|
| DRSC04094 | 1 | CG11269    |                  | 0  |
| DRSC04601 | 2 | Cdk9       | CDK9             | 0  |
| DRSC04191 | 2 | CG13550    |                  | 2  |
| DRSC03801 | 3 | RpL5       |                  | 4  |
| DRSC03737 | 2 | Ef2b       | EEF2             | 0  |
| DRSC04559 | 2 | dom        |                  | 1  |
| DRSC03757 | 2 | CG33870    | HIST2H2BF        | 0  |
| DRSC03704 | 3 | RpL21      | RPL21, LOC729402 | 0  |
| DRSC04648 | 3 | RpL23      | RPL23            | 0  |
| DRSC04987 | 1 | CG3267     | MCCC2            | 0  |
| DRSC04883 | 1 | Nipped-A   | TRRAP            | 0  |
| DRSC06808 | 1 | CSN7       | COPS7B           | 0  |
| DRSC07662 | 2 | phr        |                  | 0  |
| DRSC04344 | 2 | RpL12      |                  | 0  |
| DRSC06787 | 2 | Not1       | CNOT1            | 0  |
| DRSC06651 | 1 | CG17050    |                  | 0  |
| DRSC06797 | 1 | CG1888     |                  | 0  |
| DRSC07408 | 3 | E(Pc)      |                  | 0  |
| DRSC07397 | 3 | DebB       | SNRPF            | 6  |
| DRSC07553 | 3 | SmD3       | SNRPD3           | 1  |
| DRSC05953 | 3 | CG8878     |                  | 0  |
| DRSC07517 | 3 | Prosbeta5  | PSMB5            | 2  |
| DRSC06716 | 3 | RpL31      |                  | 0  |
| DRSC06371 | 1 | CG13337    |                  | 1  |
| DRSC07078 | 1 | CG8093     | LIPM             | 0  |
| DRSC06196 | 1 | kn         | EBF2             | 11 |
| DRSC06644 | 1 | CG17034    | ATP8A1           | 0  |
| DRSC07538 | 3 | RpL18A     | LOC285053        | 0  |
| DRSC07151 | 3 | RpS15      | RPS15            | 3  |
| DRSC05998 | 1 | CG10734    |                  | 0  |
| DRSC07539 | 3 | RpLP2      | RPLP2            | 3  |
| DRSC07519 | 1 | Psi        | FUBP1            | 2  |
| DRSC06900 | 3 | eIF3-S9    | EIF3S9           | 0  |
| DRSC07088 | 2 | dup        | CDT1             | 0  |
| DRSC06675 | 1 | GstE5      |                  | 0  |
| DRSC08307 | 2 | mRpL23     | MRPL23           | 0  |
| DRSC07665 | 1 | plu        |                  | 0  |
| DRSC07556 | 3 | Spt5       | SUPT5H           | 0  |
| DRSC08494 | 1 | CG32306    |                  | 0  |
| DRSC08634 | 1 | FucTD      |                  | 0  |
| DRSC07423 | 1 | Elongin-C  | TCEB1            | 1  |
| DRSC07583 | 2 | betaTub56D | TUBB2C           | 4  |
| DRSC07818 | 2 | RpL38      |                  | 0  |
| DRSC08731 | 1 | pUf68      | SIAHBP1          | 4  |
| DRSC11401 | 1 | tan        |                  | 0  |
| DRSC10339 | 1 | CG18769    | CCDC109A         | 0  |
| DRSC08225 | 1 | CG12017    |                  | 4  |
| DRSC10235 | 1 | CG16998    |                  | 0  |
| DRSC10274 | 2 | mad2       | MAD2L1           | 0  |



|           |   |             |         |    |
|-----------|---|-------------|---------|----|
| DRSC08183 | 1 | CG11357     |         | 0  |
| DRSC10452 | 2 | CG4835      |         | 16 |
| DRSC08701 | 2 | TfIIEbata   | GTF2E2  | 0  |
| DRSC11165 | 2 | Fad2        |         | 2  |
| DRSC10696 | 2 | CG6694      |         | 1  |
| DRSC11271 | 1 | RpS17       | RPS17   | 0  |
| DRSC10533 | 2 | CG5651      | ABCE1   | 0  |
| DRSC10474 | 2 | MED10       | MED10   | 0  |
| DRSC11341 | 2 | eIF-2beta   | EIF2S2  | 2  |
| DRSC11272 | 1 | RpS4        | RPS4X   | 0  |
| DRSC11330 | 2 | brm         | SMARCA4 | 1  |
| DRSC11412 | 3 | zetaCOP     | COPZ1   | 0  |
| DRSC10489 | 1 | CG5161      | TRAPPC2 | 0  |
| DRSC09800 | 1 | snRNP69D    | SNRPD1  | 1  |
| DRSC11275 | 3 | Rpn12       | PSMD8   | 0  |
| DRSC11222 | 1 | Mi-2        | CHD4    | 2  |
| DRSC11388 | 2 | rept        | RUVBL2  | 1  |
| DRSC11663 | 2 | Spc105R     |         | 0  |
| DRSC10912 | 2 | CG7757      | PRPF3   | 0  |
| DRSC10726 | 2 | RpL26       | RPL26   | 0  |
| DRSC11876 | 3 | Pros54      | PSMD4   | 0  |
| DRSC12623 | 3 | alphaTub84D | TUBA3D  | 3  |
| DRSC17034 | 2 | puc         | DUSP10  | 2  |
| DRSC14371 | 1 | CG31258     |         | 1  |
| DRSC16535 | 1 | CG9667      | ISY1    | 2  |
| DRSC12622 | 2 | alphaTub84B | TUBA1A  | 3  |
| DRSC11947 | 2 | Qm          |         | 0  |
| DRSC14531 | 1 | dpr4        |         | 3  |
| DRSC16827 | 1 | Rlc1        | MRPL47  | 0  |
| DRSC16393 | 1 | CG8165      | JMJD1B  | 1  |
| DRSC16611 | 2 | CoVa        | COX5A   | 0  |
| DRSC16433 | 1 | RpS29       | RPS29   | 0  |
| DRSC15147 | 2 | CG33936     | ZFAND6  | 0  |
| DRSC16555 | 1 | bel         | DDX3X   | 4  |
| DRSC16899 | 3 | alphaTub85E | TUBA1C  | 4  |
| DRSC14573 | 1 | CG12945     |         | 0  |
| DRSC16493 | 1 | CG9444      |         | 0  |
| DRSC17029 | 1 | pont        | RUVBL1  | 0  |
| DRSC16834 | 2 | RpL3        | RPL3    | 0  |
| DRSC16388 | 1 | ps          | NOVA1   | 1  |
| DRSC15678 | 1 | mRpL9       | MRPL9   | 1  |
| DRSC16387 | 1 | CG8141      |         | 0  |
| DRSC16231 | 1 | btsz        |         | 0  |
| DRSC16940 | 3 | eff         | UBE2D3  | 0  |
| DRSC15119 | 2 | RpS30       | FAU     | 1  |
| DRSC17018 | 1 | nos         |         | 26 |
| DRSC14708 | 1 | CG13858     |         | 0  |
| DRSC16291 | 1 | CG7698      | CPSF3   | 1  |
| DRSC15804 | 2 | snRNP-U1    | SNRPC   | 0  |

|           |   |             |          |    |
|-----------|---|-------------|----------|----|
| DRSC16836 | 1 | RpS20       | RPS20    | 0  |
| DRSC16937 | 2 | eIF-1A      | EIF1AX   | 0  |
| DRSC16808 | 2 | Rab1        | RAB1A    | 1  |
| DRSC15687 | 2 | CG4963      | SLC25A37 | 0  |
| DRSC17091 | 1 | ttk         |          | 18 |
| DRSC16984 | 1 | larp        |          | 9  |
| DRSC16321 | 1 | CG7824      |          | 0  |
| DRSC16973 | 1 | janB        |          | 0  |
| DRSC14742 | 2 | CG14247     |          | 4  |
| DRSC15691 | 2 | Mes-4       | WHSC1    | 0  |
| DRSC16326 | 1 | CG31038     |          | 3  |
| DRSC17194 | 1 | ATPsyn-beta | ATP5B    | 0  |
| DRSC17731 | 2 | tlk         |          | 1  |
| DRSC18646 | 1 | CG3708      |          | 0  |
| DRSC18382 | 1 | CG4857      |          | 2  |
| DRSC17920 | 1 | CG14423     |          | 5  |
| DRSC18184 | 2 | crn         | CRNKL1   | 3  |
| DRSC18091 | 2 | CG15785     |          | 0  |
| DRSC18368 | 1 | CG4557      | TMF1     | 3  |
| DRSC18006 | 3 | CG15321     |          | 11 |
| DRSC18686 | 1 | ND75        | NDUFS1   | 0  |
| DRSC18355 | 1 | Sas10       | SAS10    | 0  |
| DRSC17886 | 1 | CG16752     |          | 0  |
| DRSC18750 | 1 | c12.1       | HSPC148  | 6  |
| DRSC18347 | 2 | RpL35       | RPL35    | 0  |
| DRSC18241 | 1 | CG2909      |          | 0  |
| DRSC18666 | 2 | Gclc        | GCLC     | 0  |
| DRSC19831 | 2 | RpS15Ab     |          | 0  |
| DRSC20368 | 2 | sbr         | NXF1     | 1  |
| DRSC06831 | 3 | CG2249      |          | 0  |
| DRSC19372 | 1 | CG34346     |          | 4  |
| DRSC11632 | 2 | Mes2        |          | 1  |
| DRSC16835 | 2 | RpL32       | RPL32    | 1  |
| DRSC22145 | 2 | RpLP1       | RPLP1    | 21 |
| DRSC22323 | 2 | RpL18       | RPL18    | 0  |
| DRSC22359 | 3 | polo        | PLK1     | 2  |
| DRSC21625 | 1 | Klp3A       | KIF4A    | 0  |
| DRSC22614 | 1 | IP3K2       |          | 5  |
| DRSC22218 | 1 | betaTub60D  | TUBB3    | 1  |
| DRSC22723 | 1 | CG31246     |          | 34 |
| DRSC22110 | 2 | RpLP0       | RPLP0    | 0  |
| DRSC22071 | 2 | snRNP70K    | SNRP70   | 1  |
| DRSC22667 | 2 | CG9775      |          | 0  |
| DRSC22926 | 2 | tlk         |          | 0  |
| DRSC22794 | 1 | pum         | PUM2     | 0  |
| DRSC22819 | 2 | RpL22       | RPL22    | 8  |
| DRSC23111 | 2 | Tbp         | TBP      | 0  |
| DRSC01413 | 1 | CG31775     |          | 92 |
| DRSC23091 | 1 | MED11       |          | 1  |

|           |   |         |   |
|-----------|---|---------|---|
| DRSC36563 | 1 | CR32477 | 0 |
| DRSC23240 | 1 | msopa   | 0 |

**Table S2. List of genes in secondary screen.**

| <b>Amplicon</b> | <b>Alternative amplicon tested</b> | <b>Gene \Flybase_ID</b> | <b>Human Homologene</b> | <b>of Interest</b> |
|-----------------|------------------------------------|-------------------------|-------------------------|--------------------|
| DRSC22061       | DRSC39837                          | olf186-F                | TMEM142A                | 3                  |
| DRSC20158       | DRSC39682                          | Stim                    | STIM1                   | 3                  |
| DRSC26195       | DRSC26195                          | Ca-P60A                 | ATP2A1                  | 3                  |
| DRSC17154       | DRSC38802                          | CG2165                  | ATP2B3                  | 3                  |
| DRSC04476       | DRSC36117                          | CG4589                  | LETM1                   | 3                  |
| DRSC18796       |                                    | Tom40                   | TOMM40                  | 3                  |
| DRSC28442       | DRSC28442                          | tomboy40                |                         | 2                  |
| DRSC14384       | DRSC33250                          | CG11779                 | TIMM44                  | 2                  |
| DRSC10899       | DRSC39868                          | Tom20                   | TOMM20                  | 2                  |
| DRSC02774       | DRSC34518                          | CG4738                  | NUP160                  | 2                  |
| DRSC07129       |                                    | CG8257                  | CARS2                   |                    |
| DRSC29510       | DRSC29510                          | mRpL16                  | MRPL16                  | 1                  |
| DRSC12301       | DRSC32363                          | CG2097                  | SYMPK                   | 3                  |
| DRSC08721       | DRSC34572                          | mge                     | TOMM22                  | 3                  |
| DRSC19338       | DRSC31082                          | CG6842                  | VPS4B                   | 3                  |
| DRSC11330       | DRSC30901                          | brm                     | SMARCA4                 | 2                  |
| DRSC28422       | DRSC30704                          | cact                    | NFKBIA                  | 2                  |
| DRSC28822       | DRSC35681                          | dalao                   | SMARCE1                 |                    |
| DRSC29504       | DRSC31772                          | ncm                     | KIAA1604                | 1                  |
| DRSC29315       | DRSC29574                          | ps                      | NOVA1                   |                    |
| DRSC29851       | DRSC33339                          | Rab1                    | RAB1A                   | 2                  |
| DRSC03574       | DRSC30716                          | mts                     | PPP2CB                  | 2                  |
| DRSC29362       | DRSC32828                          | CG1244                  |                         | 2                  |
| DRSC03569       | DRSC38084                          | me31B                   | DDX6                    | 2                  |
| DRSC10516       | DRSC30863                          | MED19                   | MED19                   | 2                  |
| DRSC12387       | DRSC31247                          | sec23                   | SEC23A                  | 1                  |
| DRSC14109       | DRSC31420                          | Ald                     | aldolase A              | 2                  |
| DRSC17022       | DRSC33079                          | osa                     | ARID1A                  | 2                  |
| DRSC16133       | DRSC39065                          | Fer3                    | FERD3L                  | 2                  |
| DRSC16150       | DRSC35466                          | Nup133                  | NUP133                  | 2                  |
| DRSC16711       | DRSC32138                          | Hsc70-4                 |                         | 1                  |
| DRSC16810       | DRSC31657                          | Rab7                    | RAB7A                   | 2                  |
| DRSC17997       | DRSC27473                          | CG1531                  |                         |                    |
| DRSC18116       |                                    | CG1677                  | NHN1                    | 3                  |
| DRSC03463       | DRSC33063                          | MED20                   | TRFP                    | 2                  |
| DRSC06644       | DRSC06644                          | CG17034                 | ATP8A1                  | 1                  |
| DRSC10533       | DRSC32078                          | CG5651                  | ABCE1                   | 2                  |
| DRSC07955       | DRSC31917                          | CG7971                  | SRRM2                   | 2                  |
| DRSC17638       | DRSC31031                          | Hk                      | KCNAB1                  |                    |
| DRSC05050       | DRSC33652                          | CG11166                 |                         |                    |
| DRSC13664       | DRSC30941                          | nAcRalpha-96Aa          | CHRNA3                  | 2                  |
| DRSC23615       | DRSC32150                          | MED15                   | PCQAP                   | 1                  |
| DRSC28179       | DRSC30824                          | Klp61F                  | KIF11                   | 2                  |
| DRSC03492       |                                    | beta'Cop                | COPB2                   | 2                  |
| DRSC30006       | DRSC30006                          | CG15609                 | EHBP1                   |                    |
| DRSC23203       | DRSC33101                          | sima                    |                         | 2                  |

|           |           |           |          |   |
|-----------|-----------|-----------|----------|---|
| DRSC20283 | DRSC32209 | Rpt3      | PSMC4    | 3 |
| DRSC23578 | DRSC34254 | desat1    |          | 3 |
| DRSC24497 | DRSC24497 | CG17751   |          | 1 |
| DRSC24015 | DRSC34556 | Hsc70-5   | HSPA9    | 1 |
| DRSC03036 | DRSC29438 | Hsp60C    |          | 1 |
| DRSC21247 | DRSC34562 | Hsp70Bb   | Hsp70Bb  | 1 |
| DRSC25052 |           | Hsp83     |          | 1 |
| DRSC25105 | DRSC33319 | Hsc70-3   | HSPA5    | 2 |
| DRSC25108 | DRSC32144 | lark      | RBM4B    | 2 |
| DRSC02161 | DRSC29181 | JhI-21    | SLC7A5   |   |
| DRSC28394 | DRSC31394 | Pp2A-29B  | PPP2R1A  | 2 |
| DRSC26676 | DRSC35320 | CG4196    | TMEM165  |   |
| DRSC03444 | DRSC37259 | Stam      | STAM     | 2 |
| DRSC03384 | DRSC34700 | Nup154    | NUP155   | 2 |
| DRSC04456 |           | CG4266    | SFRS15   | 2 |
| DRSC12147 | DRSC33611 | CG1078    |          | 3 |
| DRSC14935 | DRSC31781 | CG14712   | POM121   | 3 |
| DRSC15675 | DRSC37978 | ear       | MLLT3    | 2 |
| DRSC16210 |           | CG7183    | C3orf19  |   |
| DRSC16208 | DRSC36275 | CG7168    | COMMD2   |   |
| DRSC17049 | DRSC31665 | sar1      | SAR1B    | 3 |
| DRSC15895 | DRSC39536 | CG5857    | TMEM48   | 2 |
| DRSC26038 | DRSC35049 | CG2843    | CCDC49   |   |
| DRSC16005 | DRSC32492 | mask      | ANKHD1   | 1 |
| DRSC17012 | DRSC36317 | ncd       | KIFC1    | 2 |
| DRSC18704 | DRSC35979 | Rbf       | RBL1     | 2 |
| DRSC17741 | DRSC35318 | CG4119    |          |   |
| DRSC17755 | DRSC24030 | CG10777   | DDX17    | 2 |
| DRSC20539 |           | l(1)G0269 | DULLARD  | 2 |
| DRSC05953 | DRSC31940 | CG8878    |          | 3 |
| DRSC03356 | DRSC39752 | Kr-h2     | TMEM33   |   |
| DRSC14893 | DRSC34020 | CG14550   |          | 1 |
| DRSC15687 | DRSC34889 | CG4963    | SLC25A37 | 2 |
| DRSC18750 | DRSC31704 | c12.1     | HSPC148  | 1 |
| DRSC20576 | DRSC31173 | cactin    | C19orf29 |   |
| DRSC20904 | DRSC29872 | CG17168   | SNIP1    | 1 |
| DRSC13916 |           | ligatin   | LGTN     |   |
| DRSC19425 | DRSC19644 | CG34348   | TMEM68   |   |
| DRSC23135 | DRSC30026 | MED30     | THRAP6   | 2 |
| DRSC10512 |           | PGRP-L    | TMEM11   |   |
| DRSC25280 | DRSC35474 | CG7065    |          |   |
| DRSC10339 |           | CG18769   | CCDC109A |   |
| DRSC25351 | DRSC25351 | Nacalpa   | NACA     | 1 |
| DRSC23629 | DRSC23629 | Kr-h1     |          | 1 |
| DRSC19354 | DRSC29888 | CG10353   | TMEM16B  |   |
| DRSC26948 | DRSC35756 | Gfat2     | GFPT1    | 3 |
| DRSC27224 | DRSC40402 | CG13865   |          | 2 |
| DRSC27645 | DRSC27645 | CG12702   |          |   |
| DRSC27581 | DRSC32165 | Pomp      |          | 2 |
| DRSC28779 | DRSC33488 | Bub3      | BUB3     | 2 |

|           |           |            |           |   |
|-----------|-----------|------------|-----------|---|
| DRSC29772 | DRSC34581 | Nup358     |           | 2 |
| DRSC29930 | DRSC37262 | tgo        | ARNT      | 1 |
| DRSC29013 | DRSC29013 | bys        | BYSL      |   |
| DRSC01999 | DRSC34579 | Nup107     | NUP107    | 2 |
| DRSC09772 | DRSC28750 | CG10671    | C20orf142 |   |
| DRSC00533 | DRSC40282 | CG2789     |           |   |
| DRSC00520 | DRSC35011 | CG18317    | SLC25A36  |   |
| DRSC08679 | DRSC40381 | Mtch       |           |   |
| DRSC16351 |           | CG7943     | MCART2    |   |
| DRSC20125 | DRSC39802 | CG8931     | SLC25A46  |   |
| DRSC02888 |           | CG5755     |           |   |
| DRSC07337 |           | CG9090     | SLC25A3   |   |
| DRSC10742 | DRSC35463 | CG6893     |           |   |
| DRSC15145 | DRSC34173 | CG16736    |           |   |
| DRSC15761 | DRSC39880 | CG5281     |           |   |
| DRSC14476 | DRSC33788 | CG12201    | SLC25A22  |   |
| DRSC15636 | DRSC40276 | CG4743     | SLC25A26  |   |
| DRSC15687 | DRSC34889 | CG4963     | SLC25A37  | 2 |
| DRSC17765 |           | CG10920    |           |   |
| DRSC19565 | DRSC19565 | Shawn      | SLC25A40  |   |
| DRSC19565 | DRSC19565 | Tyler      |           |   |
| DRSC17440 | DRSC39375 | vanin-like |           |   |
| DRSC27826 | DRSC27826 | porin      | VDAC2     |   |
| DRSC29490 | DRSC30967 | CG6608     |           |   |
| DRSC25627 | DRSC35013 | CG18347    |           |   |
| DRSC29759 | DRSC29759 | CG5646     |           |   |
| DRSC24316 | DRSC24316 | CG2616     |           |   |
| DRSC00808 | DRSC29025 | colt       | SLC25A20  |   |
| DRSC02714 | DRSC39544 | CG3476     |           |   |
| DRSC02801 |           | CG4995     | SLC25A29  |   |
| DRSC06721 | DRSC26600 | CG18324    |           |   |
| DRSC08535 | DRSC25732 | CG18418    | SLC25A11  |   |
| DRSC10293 | DRSC34381 | CG32103    | SLC25A24  |   |
| DRSC11261 | DRSC31659 | Rab8       | RAB8A     |   |
| DRSC16114 | DRSC40350 | CG6782     | SLC25A1   |   |
| DRSC14125 | DRSC35572 | CG8790     | SLC25A10  |   |
| DRSC15561 | DRSC24659 | CG4323     |           |   |
| DRSC15399 | DRSC40303 | CG1907     |           |   |
| DRSC18109 |           | CG1628     | SLC25A15  |   |
| DRSC20625 | DRSC27260 | CG14613    |           | 1 |
| DRSC03267 |           | CG9582     |           |   |
| DRSC04322 | DRSC40008 | CG2857     |           |   |
| DRSC06058 |           | CG11196    |           |   |
| DRSC07056 | DRSC40234 | CG8026     | SLC25A32  |   |
| DRSC07149 | DRSC35542 | CG8323     | SLC25A34  |   |
| DRSC06722 | DRSC39345 | CG18327    |           |   |
| DRSC08597 | DRSC25670 | CG7514     | SLC25A11  |   |
| DRSC10317 | DRSC35014 | CG18363    |           |   |
| DRSC15556 |           | CG4241     | SLC25A42  |   |
| DRSC18611 |           | CG5254     | SLC25A21  |   |

DRSC20371  
DRSC21939  
DRSC25670  
DRSC27260

DRSC34592  
DRSC39444  
DRSC25670  
DRSC27260

sesB  
CG32250  
CG7514  
CG14613

SLC25A6  
SLC25A17

**Table S3. List of candidate genes.**

| <b>Amplicon #1</b> | <b>Amplicon #2</b> | <b>Of Interest</b> | <b>Gene\Flybase_ID</b> | <b>Human Homologene</b> |
|--------------------|--------------------|--------------------|------------------------|-------------------------|
| DRSC04476          | DRSC36117          | 3                  | CG4589                 | LETM1                   |
| DRSC15687          | DRSC34889          | 2                  | CG4963                 | SLC25A37                |
| DRSC29504          | DRSC31772          | 2                  | ncm                    | KIAA1604                |
| DRSC07477          | DRSC25351          | 2                  | Nacalpha               | NACA                    |
| DRSC25213          | DRSC35979          | 2                  | Rbf                    | RBL1                    |
| DRSC24291          | DRSC37978          | 2                  | ear                    | MLLT3                   |
| DRSC25105          | DRSC33319          | 2                  | Hsc70-3                | HSPA5                   |
| DRSC20967          | DRSC40402          | 2                  | CG13865                |                         |
| DRSC29362          | DRSC32828          | 2                  | CG1244                 |                         |
| DRSC05050          | DRSC33652          | 2                  | CG11166                |                         |
